# Supplementary material for: A Human Organotypic Microfluidic Tumor Model Permits Investigation of the Interplay between Patient-Derived Fibroblasts and Breast Cancer Cells
Source: Oxford University Press journal article supplement (doi:10.1158/0008-5472.can-18-2293), 2019-04-16
Supplement: 00085472can182293-sup-205859_3_supp_5432999_pp7jbx.docx [file 00085472can182293-sup-205859_3_supp_5432999_pp7jbx.docx]

Supplementary Information for

A Human Organotypic Microfluidic Tumor Model Permits Investigation Of The Interplay Between Patient-Derived Fibroblasts And Breast Cancer Cells

Danh D. Truong1, Alexander Kratz1, Jin G. Park2, Eric S. Barrientos1, Harpinder Saini1, Toan Nguyen1, Barbara Pockaj3, Ghassan Mouneimne4, Joshua LaBaer2 and Mehdi Nikkhah1*

1School of Biological and Health Systems Engineering, Arizona State University, Tempe, AZ, USA.

2Virginia G. Piper Biodesign Center for Personalized Diagnostics,Biodesign Institute, Arizona State University, Tempe, AZ,

3Department of Surgery, Mayo Clinic, Phoenix, AZ, USA

4University of Arizona Cancer Center, Tucson, AZ, USA.


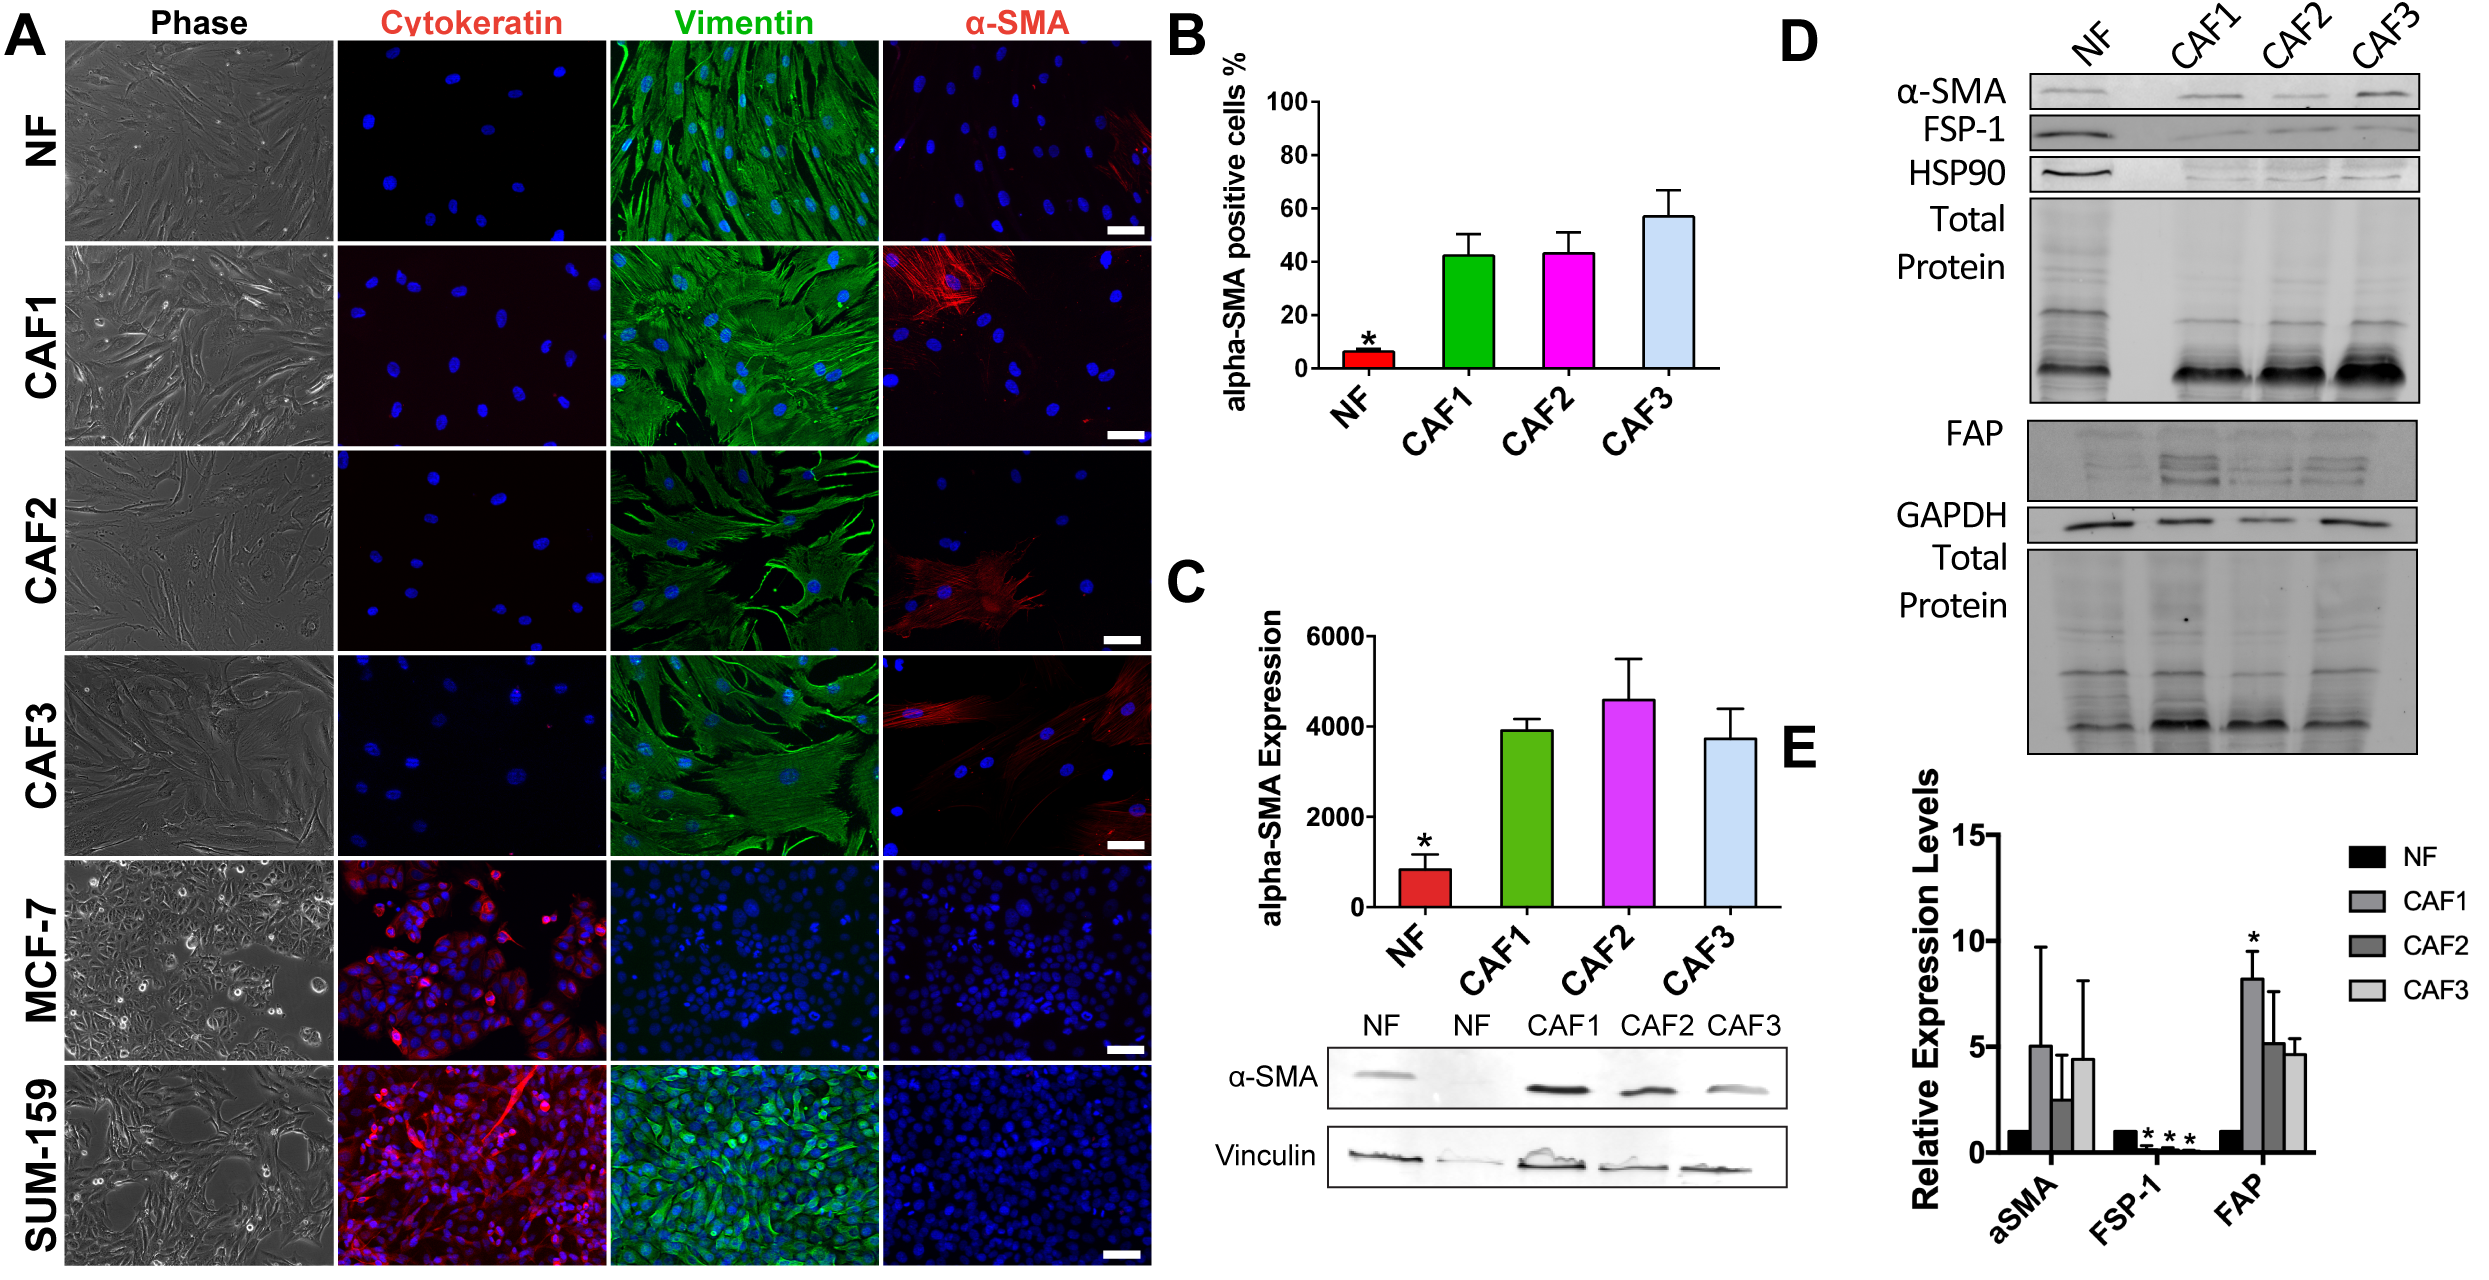


**Fig. S1
Characterization of fibroblast markers.** (A)Fibroblasts expressed vimentin and αSMA but did not express cytokeratin. MCF-7 expressed cytokeratin but did not express vimentin or αSMA. SUM-159 expressed cytokeratin and vimentin but not αSMA. Scale bar: 50 μm. (B) Percent of αSMA positive fibroblasts were significantly lower in NFs. * denotes a significantly different group for *p* <0.05. (C) Blot of αSMA and quantification showing significantly lower αSMA expression in NFs. Vinculin was used as the loading control. * denotes a significantly different group for *p* <0.05. (D) Additional blot consisting of αSMA, FSP-1, and FAP as additional markers of fibroblasts. HSP90, GAPDH, and Total Protein were used as loading controls. (E) Relative expression levels as determined by densitometry. * denotes a significantly different group for p <0.05 when compared to NF.


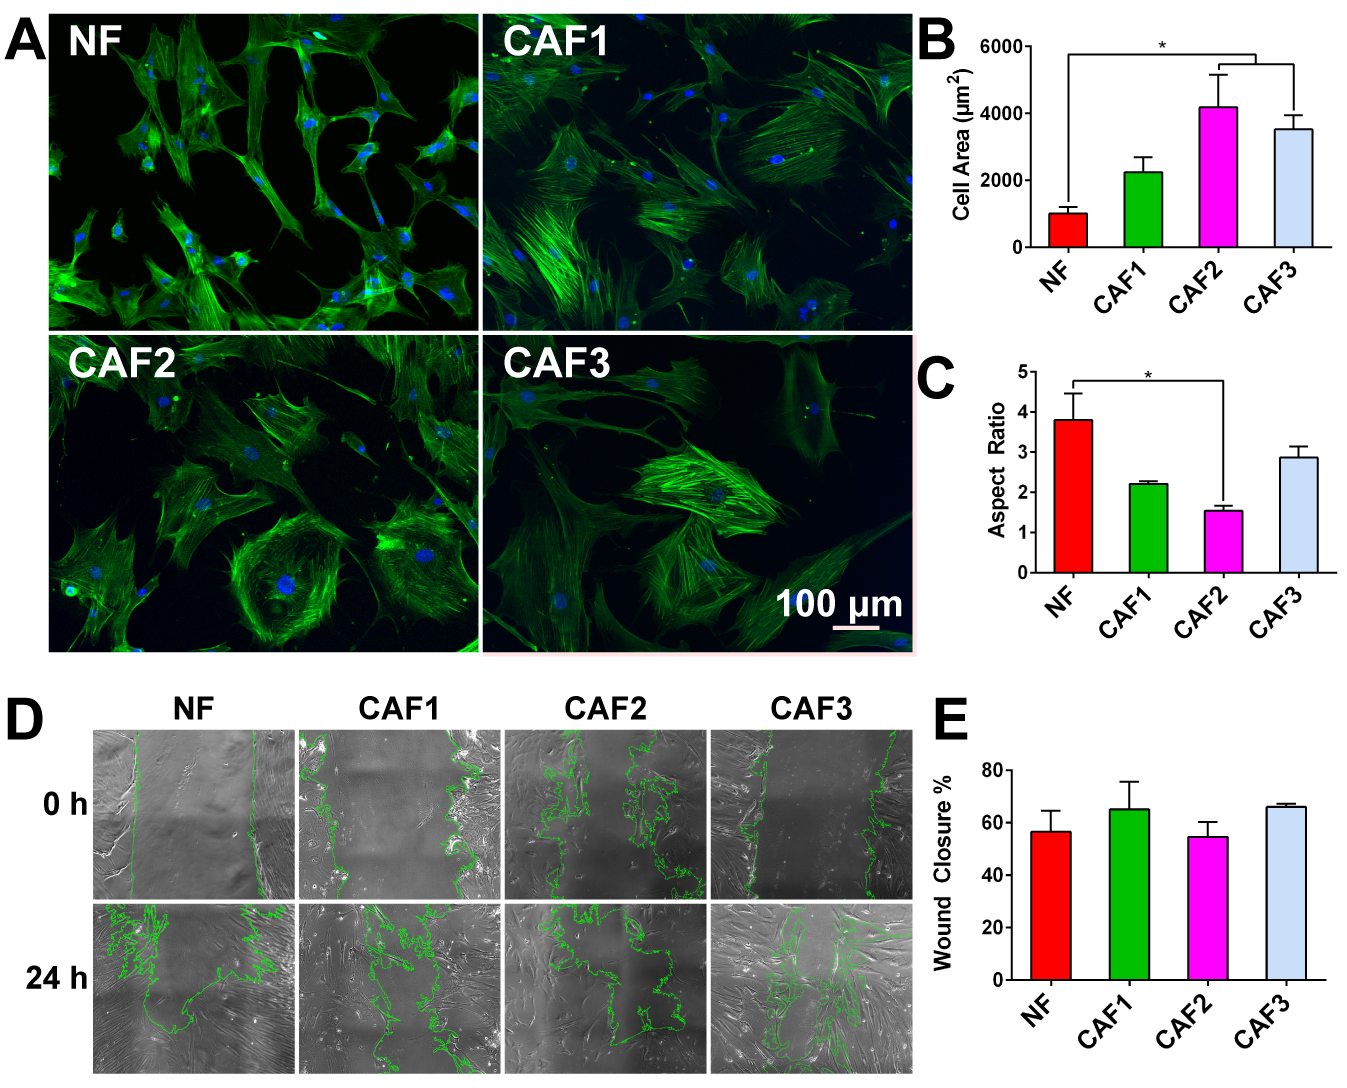


**Fig. S2**

**Characterization of fibroblast behavior**. (A) F-actin staining was used to delineate cell shape and area. (B) CAF2 and CAF3 had significantly enhanced cell area. (C) NFs had significantly increased aspect ratio compared to CAF2. * denotes a significantly difference for p <0.05. (D, E) Wound healing assay depicts 2D migration of fibroblasts with no significant difference between them.


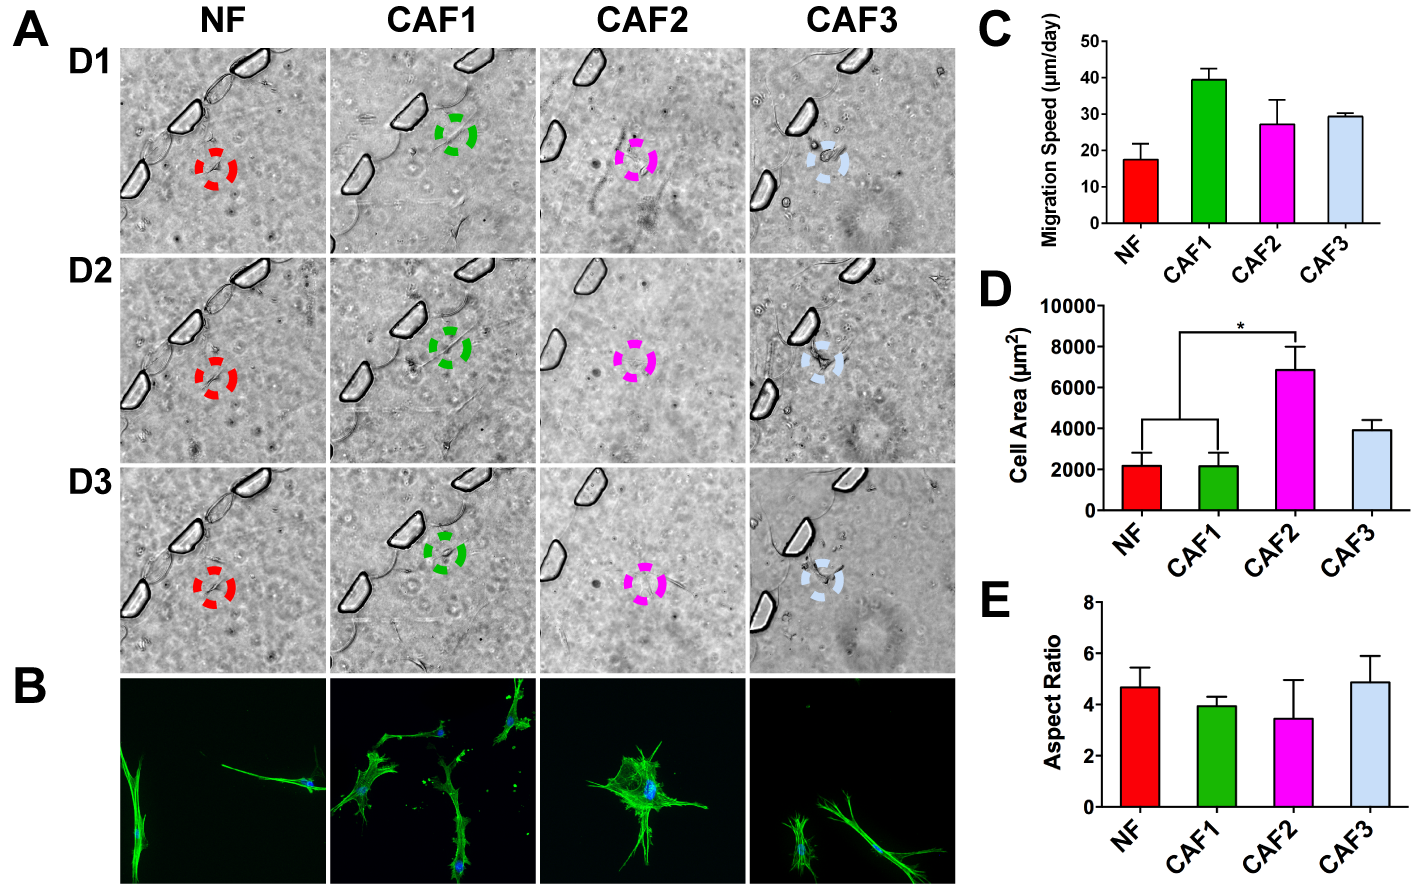


**Fig. S3**

**Patient-derived fibroblast behavior in the stroma region of the microfluidic device.** (A) Representative images of fibroblast location over 3 days. (B) Representative actin cytoskeleton image of fibroblasts in 3D. (C) Migration per day of fibroblasts. (D) Spreading cell area within 3D stroma region. * denotes a significantly different group for *p* <0.05. (E) Aspect ratio of fibroblasts.


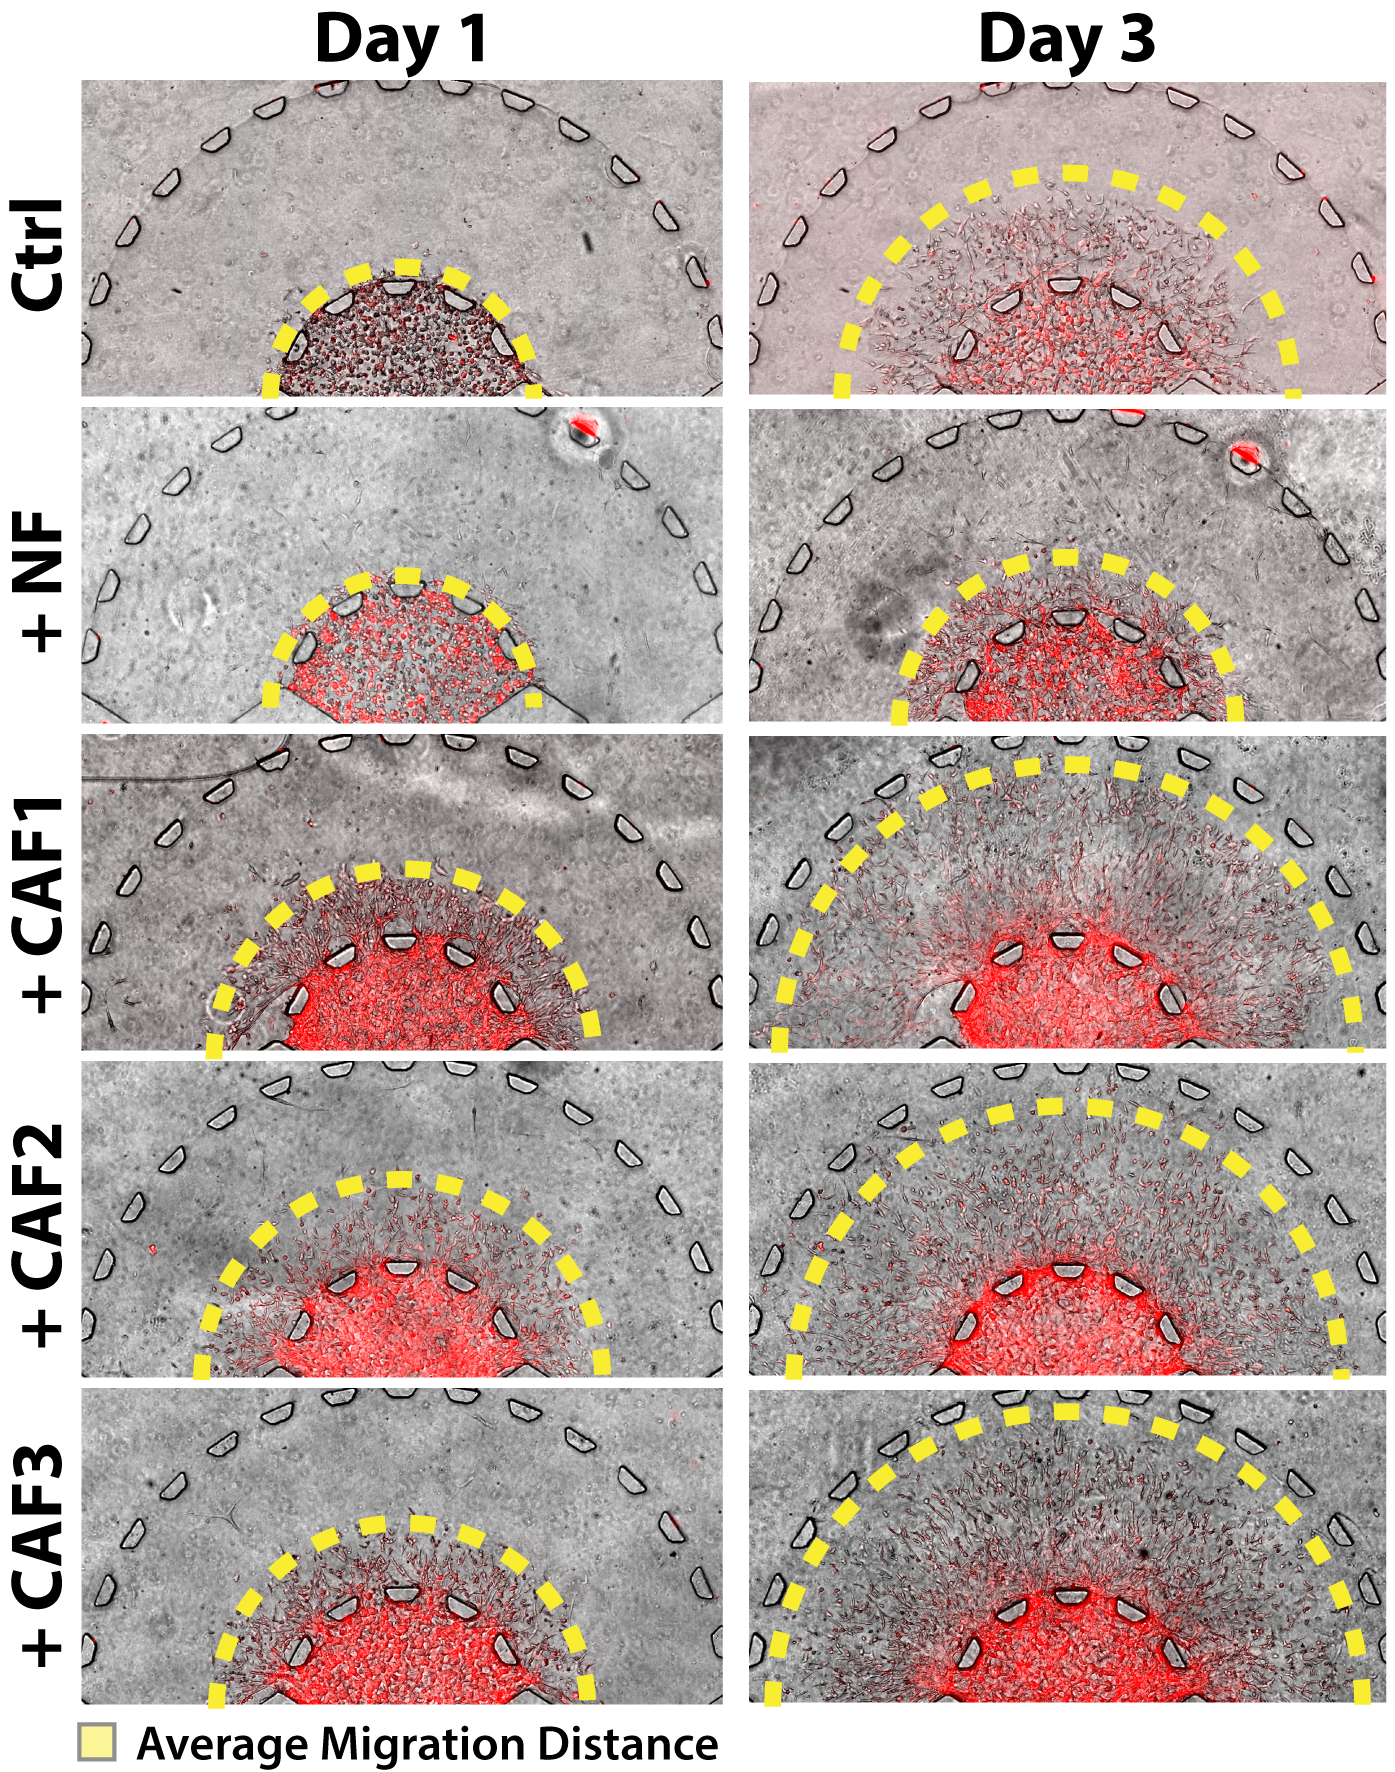


**Fig. S4**

**SUM-159 migration in microfluidic over time.** SUM-159 cells migrated in presence or absence of fibroblasts. Dashed lines represent average invading tumor front.


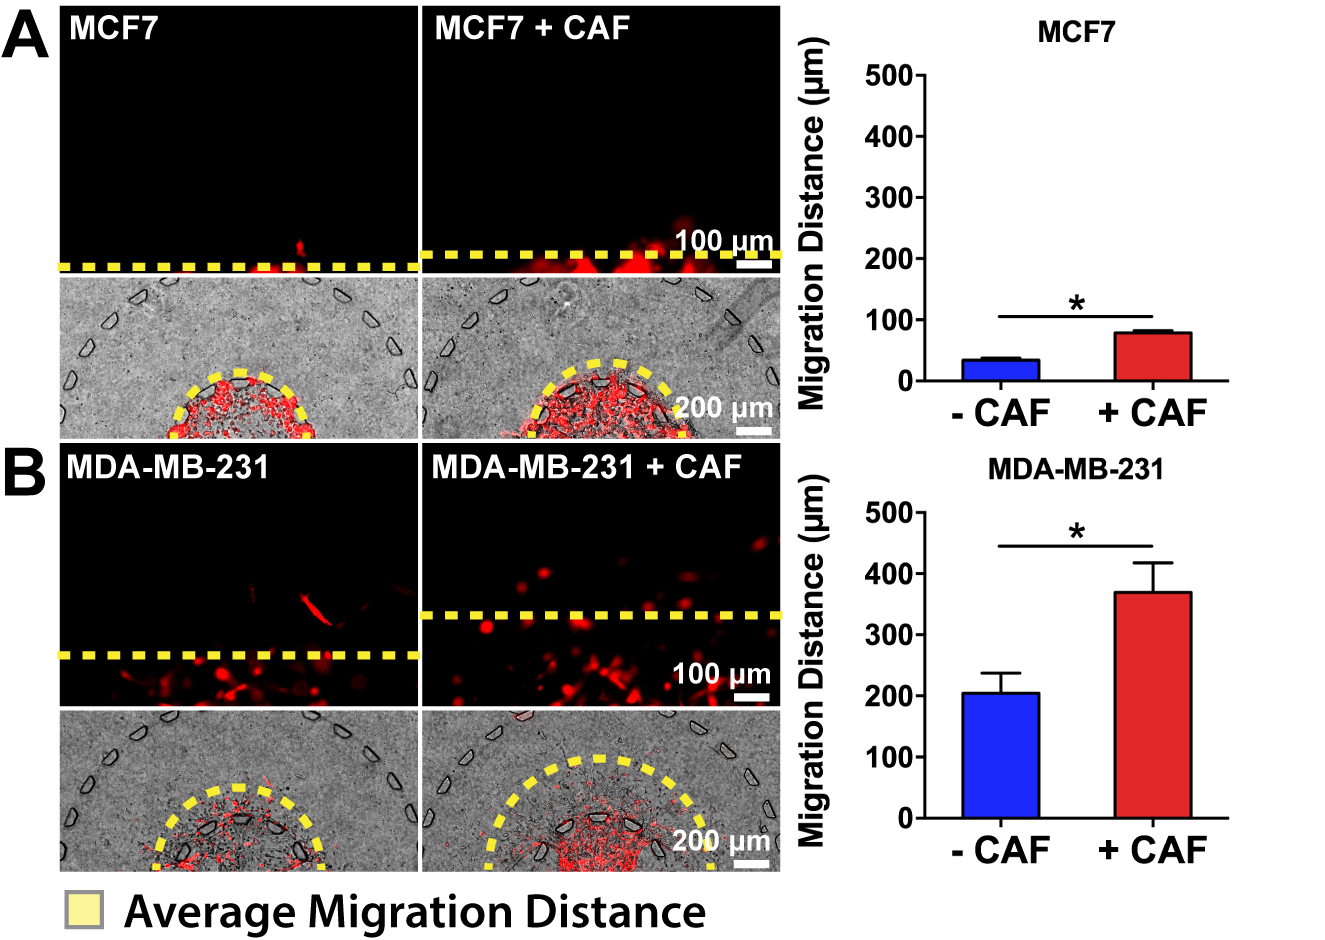


**Fig. S5**

**Breast cancer cell line behavior in response to CAF co-culture.** (A) MCF7 cells migrated into stroma in presence or absence of CAFs. * denotes a significant difference for *p* <0.05; paired t-test. (B) MDA-MB-231 cells migrated into stroma in presence or absence of CAFs. * denotes a significant difference for p <0.05.


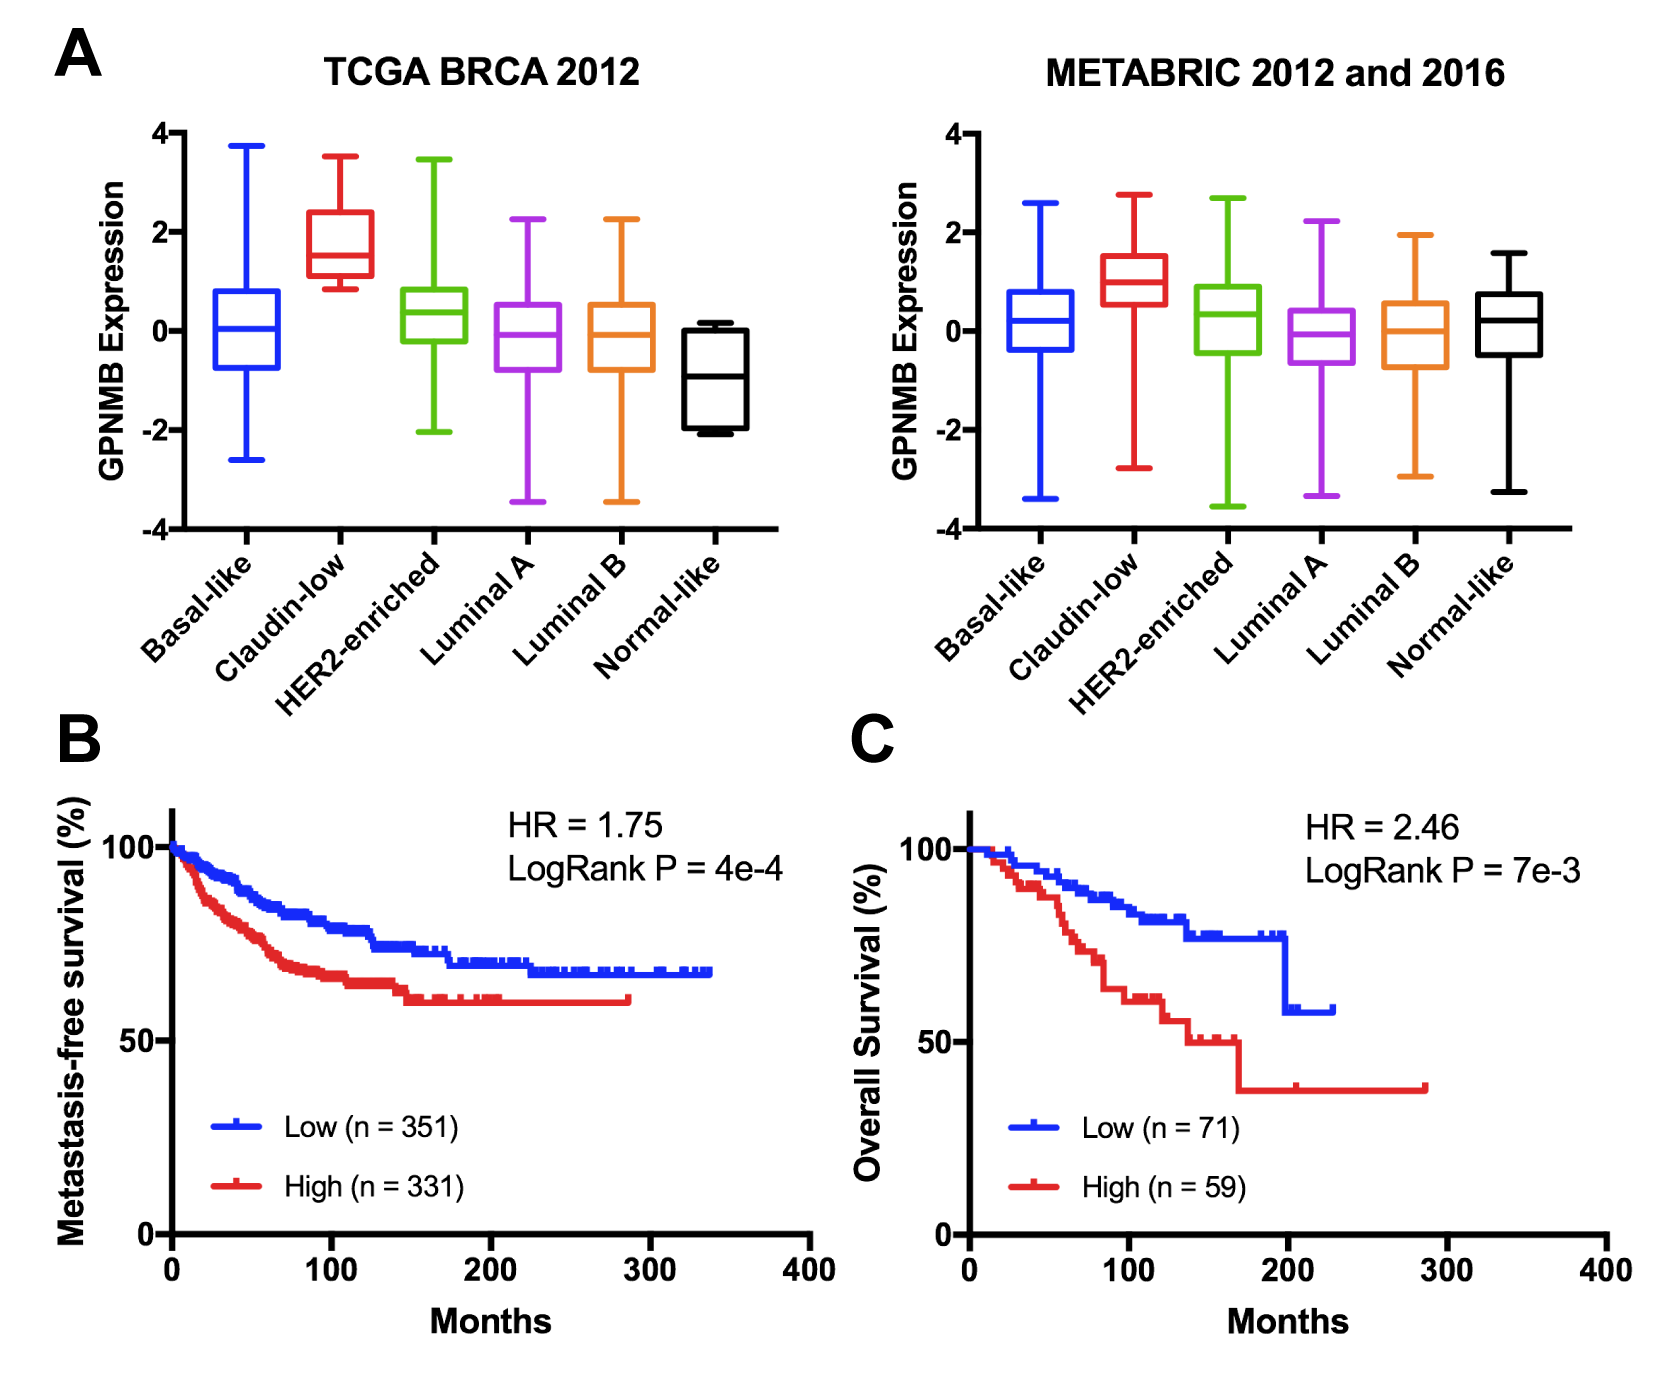


**Fig. S6**

**Additional clinical data determining the relevance of *GPNMB* in breast cancer.** (A) *GPNMB* expression in different breast cancer subtype extracted from data sets queried in CBioPortal. (B) Kaplan–Meier analysis of distant metastasis free survival based on high or low *GPNMB* expression from Geneanalytics tool (<http://geneanalytics.duhs.duke.edu)>. Patients were divided into two groups with different survival curves using *GPNMB* gene expression (quartile cutoff was set at 25% high and 75% low *GPNMB* expressions). HR, 1.75; *P* = 4e-4. (C) Kaplan–Meier analysis of overall survival based on high or low *GPNMB* expression from GeneAnalytics tool. HR, 2.46; *P* = 7e-4


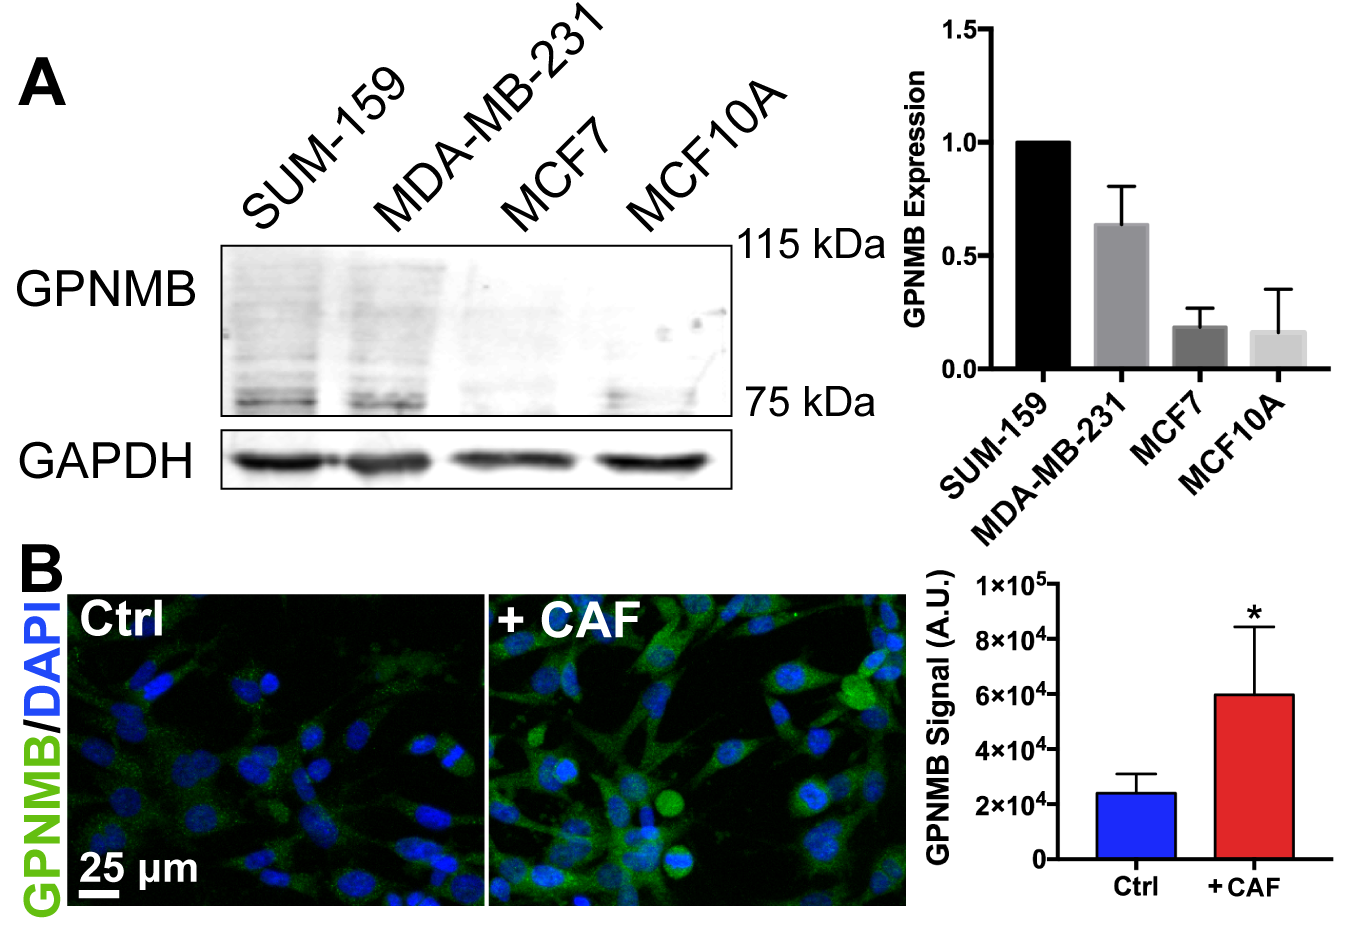


**Fig. S7**

**GPNMB expression in breast cancer cell line.** (A) Western blot showed high expression in SUM-159 and MDA-MB-231 cells and low in MCF7 and MCF10A cells. Expression was relative to SUM-159. (B)Maximum intensity z-projection demonstrated that expression of GPNMB was increased in SUM-159 breast cancer cells in co-culture. * denotes significant difference for *p* < 0.05; unpaired t-test.


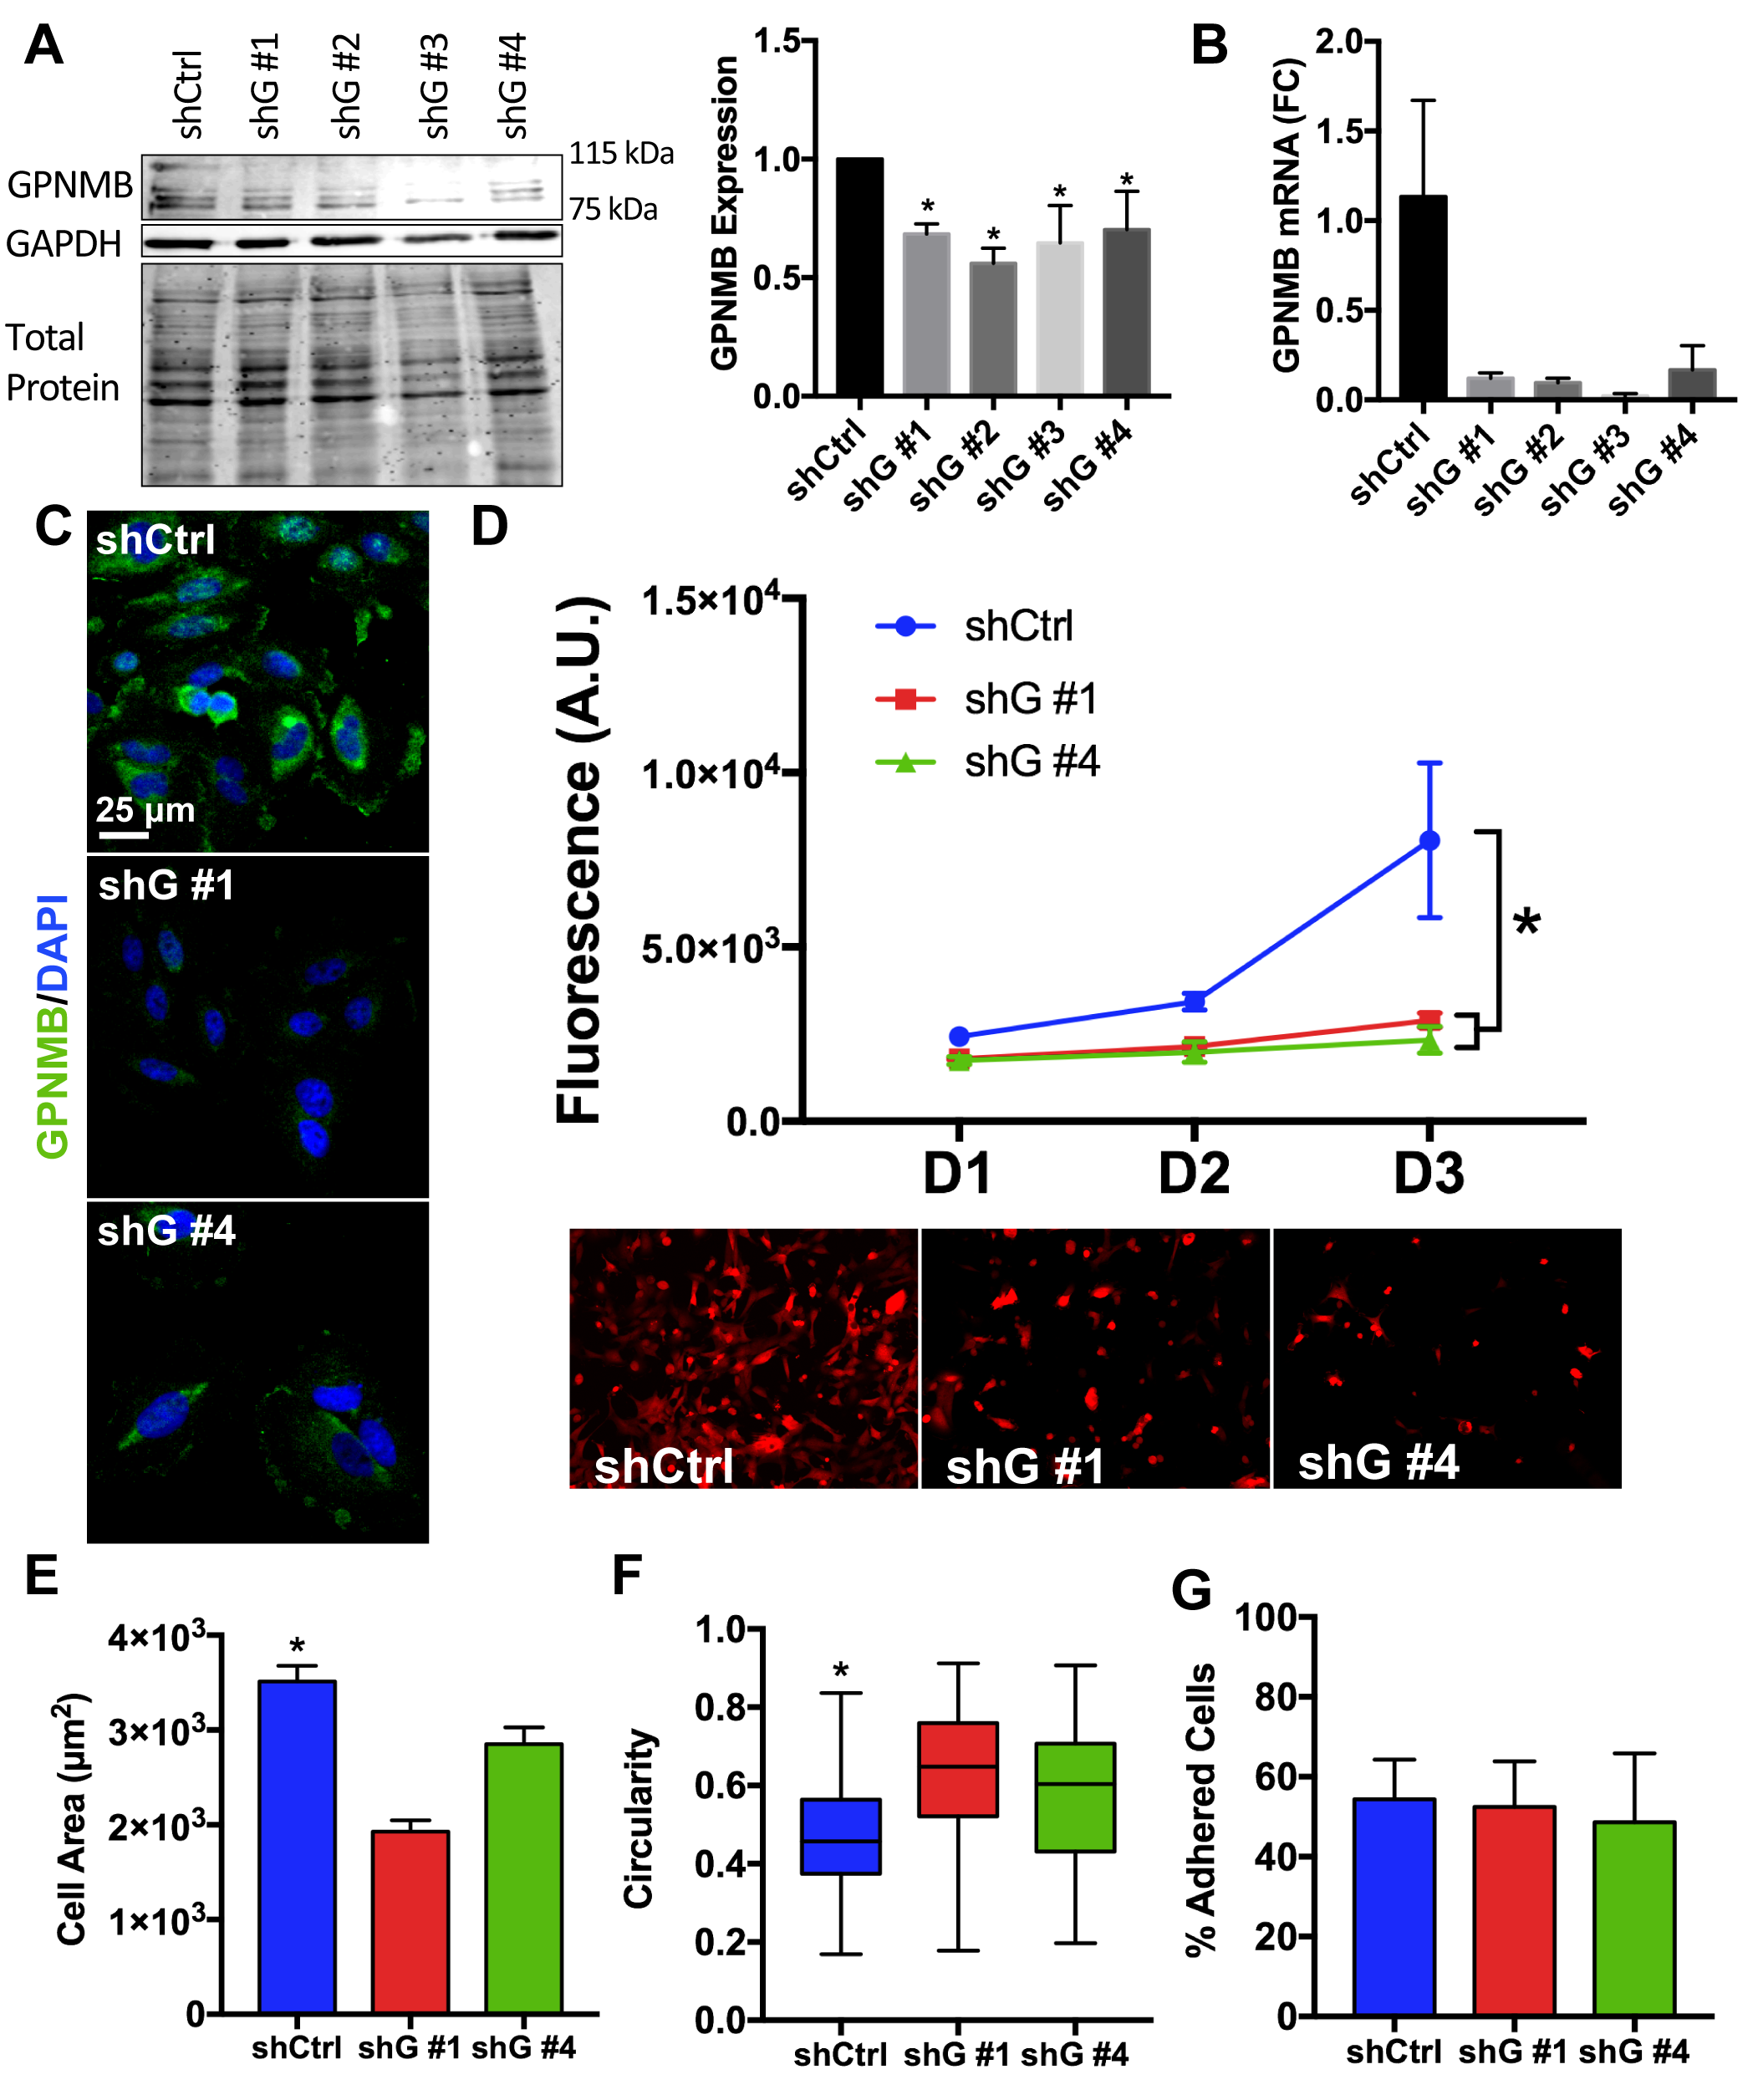


**Fig. S8**

**Characterization of GPNMB knockdown lines.** (A) Western blot showed knockdown of GPNMB in SUM-159 breast cancer cells. Expression was normalized to total protein. shG #1 and shG #4 were chosen for subsequent experiments. shG #2 had little growth in culture. * denotes a significant difference for p <0.05 when compared to control. (B) mRNA analysis of GPNMB knockdown. (C) Maximum intensity z-projection demonstrated GPNMB expression in knockdown lines on 2D glass substrate. (D) 2D Proliferation assay using AlamarBlue® for knockdown lines. shCtrl showed higher cell count after 3 days. * denotes a significant difference for *p* <0.05. (E, F) 2D Morphometric analysis showed lower cell area and higher circularity for GPNMB knockdown lines suggesting lesser invasive capacity. * denotes a significant difference for *p* <0.05. (G) 2D collagen adhesion assay showed no statistical difference in adhesion for shCtrl and shG lines.


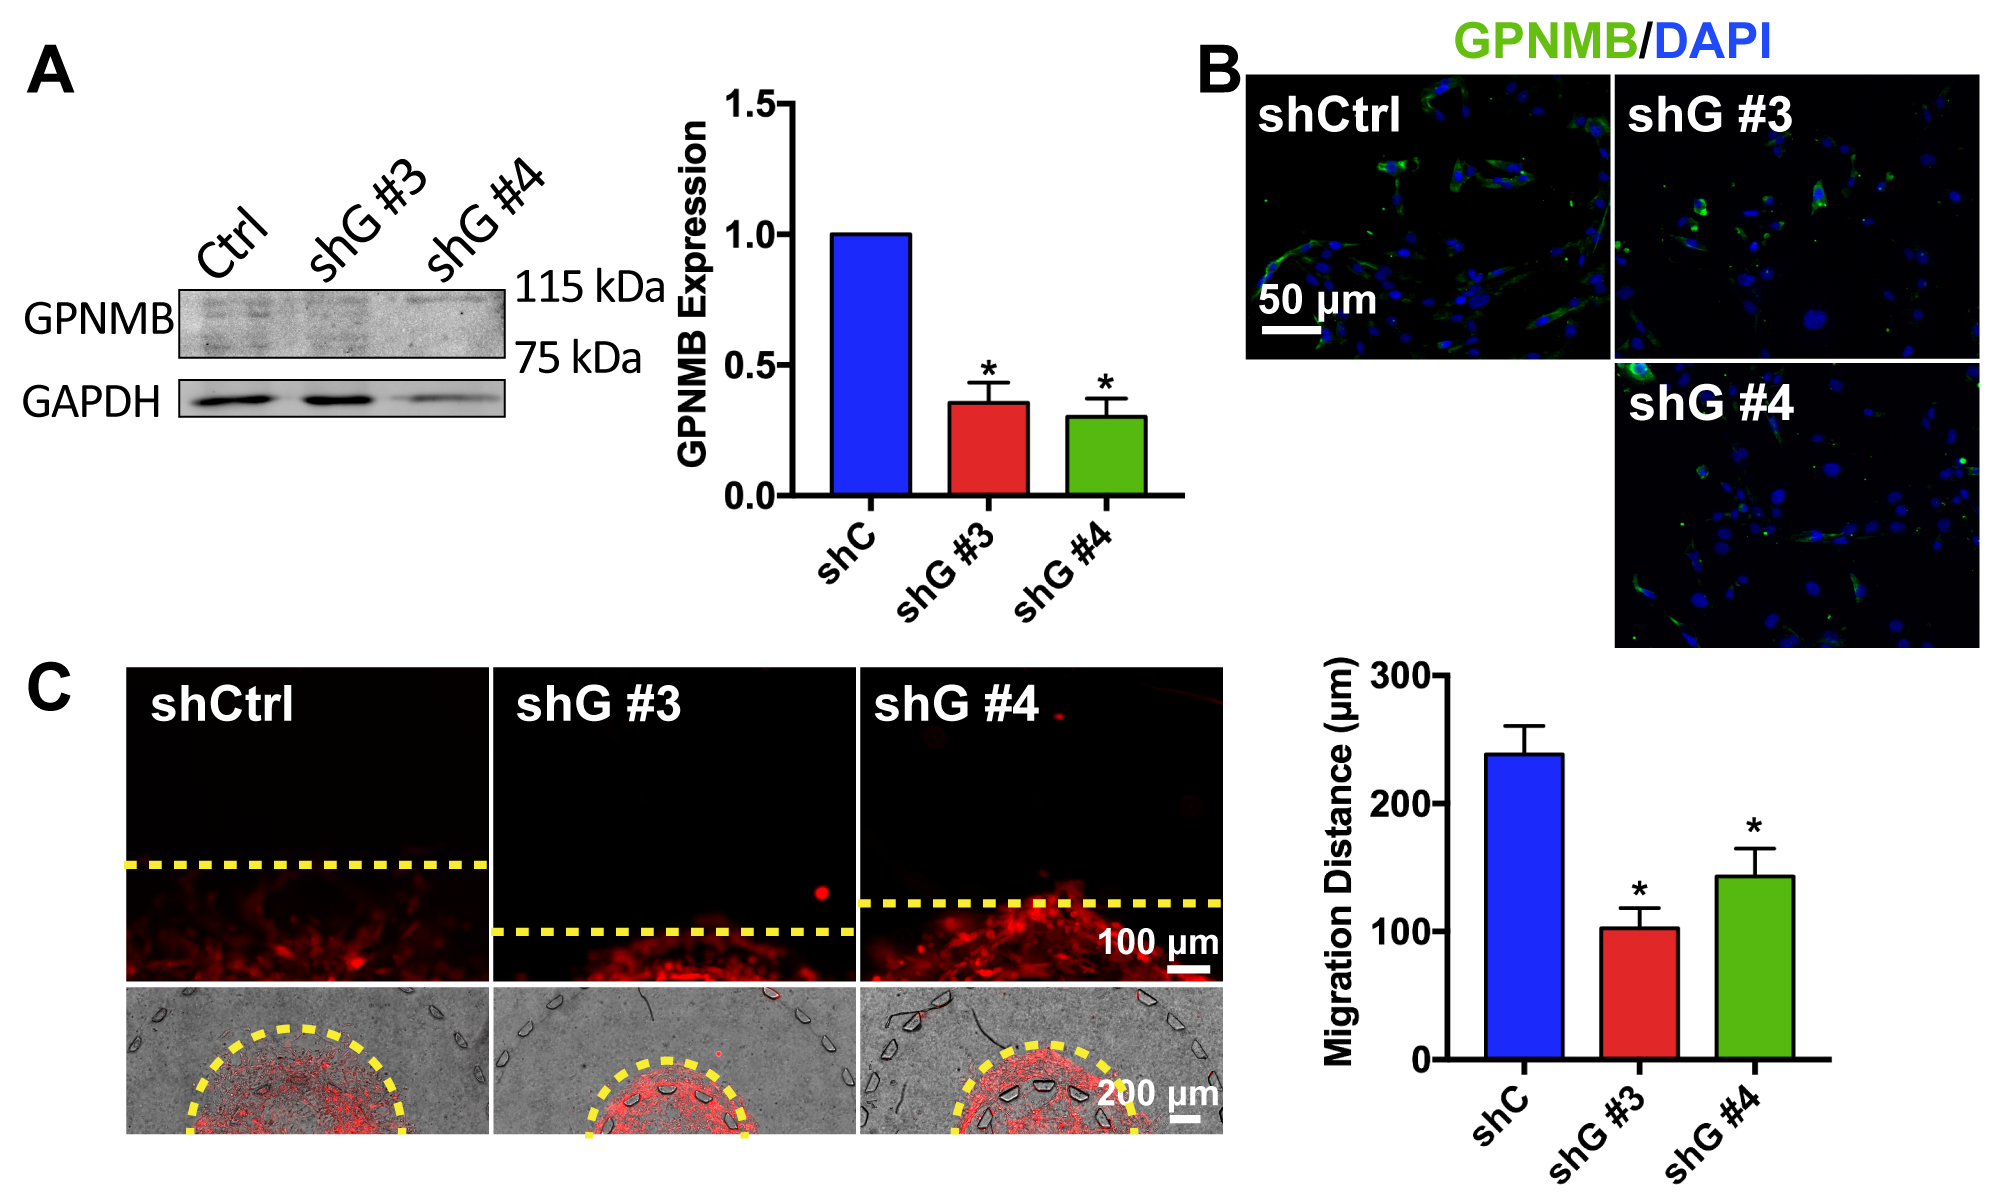


**Fig. S9**

**Characterization of GPNMB knockdown in MDA-MB-231.** (A) Western blot showed knockdown of GPNMB in MDA-MB-231 breast cancer cells. shG #3 and shG #4 were chosendue to stability in culture. * denotes a significant difference for *p* <0.05 when compared to control. (B) Maximum intensity z-projection demonstrated GPNMB expression in knockdown lines on 2D glass substrate. (C) Migration distance was lowered in GPNMB knockdown lines compared to the control for MDA-MB-231 cells. * denotes significant difference for *p* < 0.05.


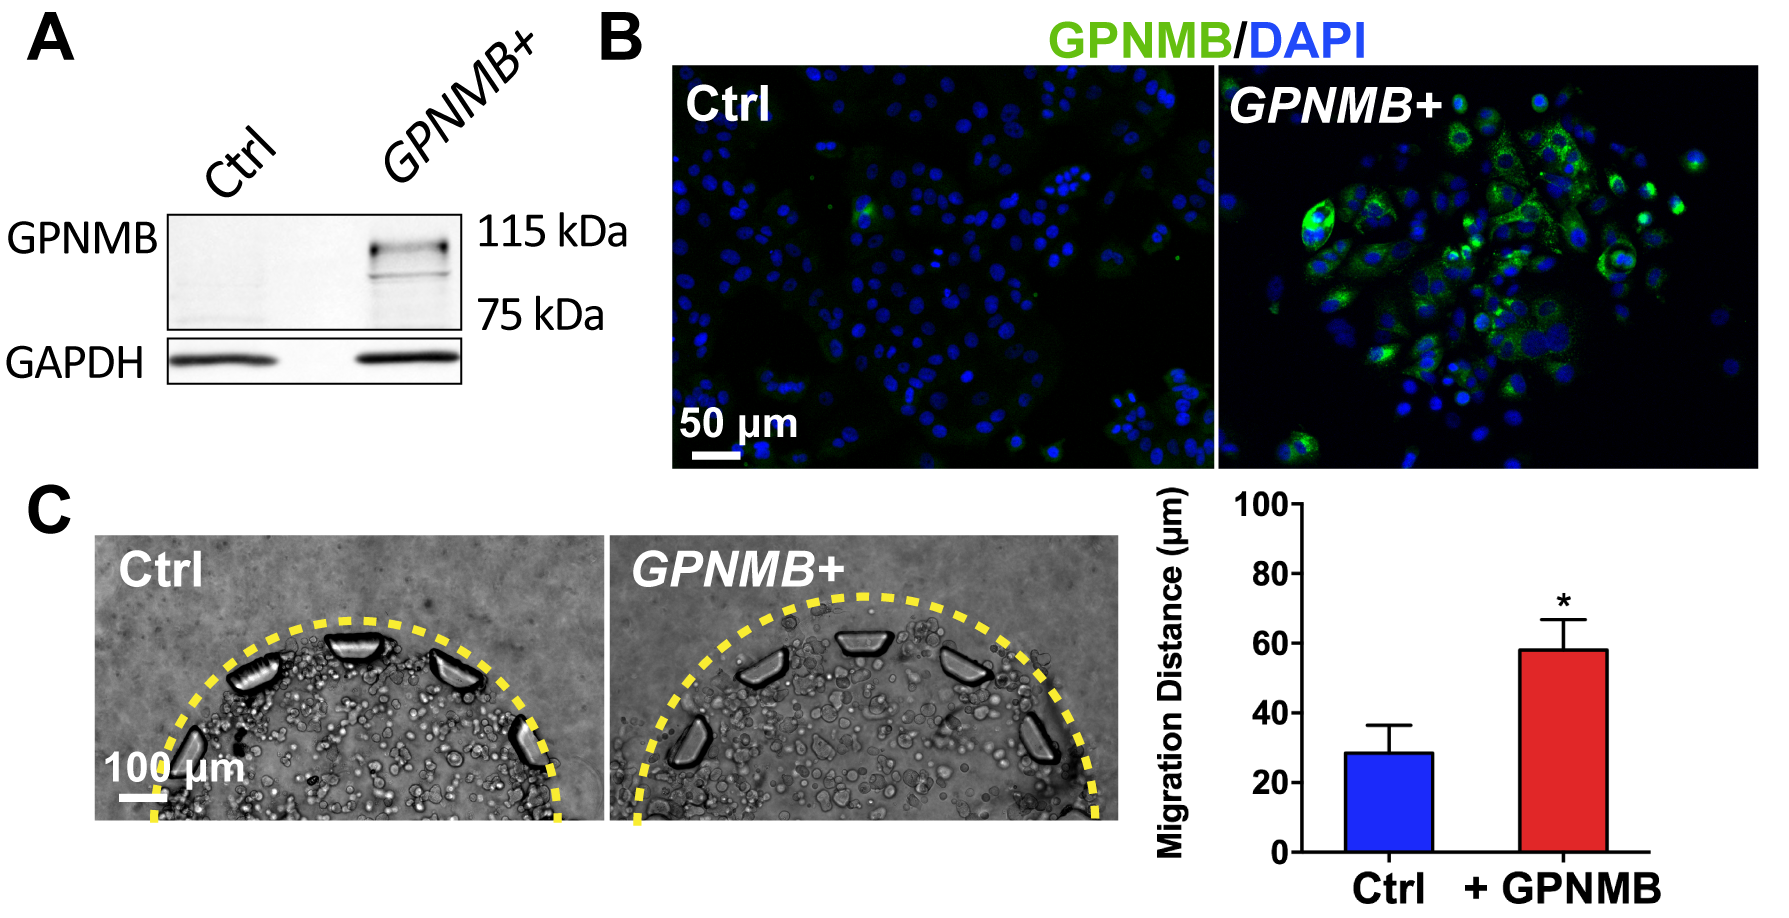


**Fig. S10**

**Characterization of GPNMB overexpression in MCF7.** (A) Western blot showed overexpression of GPNMB in MCF7 breast cancer cells. (B) Maximum intensity z-projection demonstrated GPNMB overexpression on 2D glass substrate. (C) Migration distance was increased in GPNMB overexpression line compared to the control for MCF7 cells. * denotes significant difference for *p* < 0.05.

**Movie. S1**

Time-lapse imaging of SUM-159 breast cancer cells migrating through the 3D stroma in absence of CAFs.

**Movie. S2**

Time-lapse imaging of SUM-159 breast cancer cells migrating through the 3D stroma in presence of CAFs.

**Movie. S3**

Time-lapse imaging of CAFs migrating through the 3D stroma in absence of SUM-159 breast cancer cells.

**Movie. S4**

Time-lapse imaging of CAFs migrating through the 3D stroma in presence of SUM-159 breast cancer cells.

**Movie. S5**

Time-lapse imaging of shCtrl line migrating through the 3D stroma.

**Movie. S6**

Time-lapse imaging of shG #4 line migrating through the 3D stroma.

| **Table S1. Patient data for the patient-derived cancer-associated fibroblasts** | | | |
| --- | --- | --- | --- |
|  |  |  |  |
|  |  |  |  |
|  |  |  |  |
|  | **Patient #1** | **Patient #2** | **Patient #3** |
|
|
| **Age** | 71 | 50 | 82 |
| **Type** | Infiltrating Lobular | Invasive ductal carcinoma with focal squamous differentiation | Invasive |
| **Tumor Size** | 2.1 cm | 2.3 cm | 2.6 cm |
| **Stage** | 1 | 2 | 3 |
| **Receptor Status** | ER+, PR+, Her2- | ER+, PR+, Her2- | ER-, PR-, Her2- |
| **Lymph Node** | 3/6 | 1/2 | 1/11 |

| **Table S2. List of differentially expressed genes between Ctrl and fibroblast co-cultures** | | |  |  |  |
| --- | --- | --- | --- | --- | --- |
|  |  |  |  |  |  |
|  |  |  |  |  |  |
|  |  |  |  |  |  |
| **Gene ID** | **Gene Symbol** | **Description** | **Log2(fold change) CAF/Ctrl** | **p-value** | **FDR** |
|
|
| 100302652 | GPR75-ASB3 | GPR75-ASB3 readthrough(GPR75-ASB3) | 9.64 | 2.2E-04 | 4.9E-03 |
| 1041 | CDSN | corneodesmosin(CDSN) | 7.29 | 5.3E-04 | 8.9E-03 |
| 8745 | ADAM23 | ADAM metallopeptidase domain 23(ADAM23) | 7.02 | 4.5E-04 | 8.0E-03 |
| 10563 | CXCL13 | C-X-C motif chemokine ligand 13(CXCL13) | 4.55 | 2.1E-04 | 4.8E-03 |
| 145741 | C2CD4A | C2 calcium dependent domain containing 4A(C2CD4A) | 4.31 | 3.5E-04 | 6.7E-03 |
| 400541 | LOC400541 | uncharacterized LOC400541(LOC400541) | 3.60 | 1.6E-03 | 1.9E-02 |
| 165904 | XIRP1 | xin actin binding repeat containing 1(XIRP1) | 3.43 | 3.2E-05 | 1.4E-03 |
| 79931 | TNIP3 | TNFAIP3 interacting protein 3(TNIP3) | 3.39 | 1.5E-04 | 3.8E-03 |
| 348938 | NIPAL4 | NIPA like domain containing 4(NIPAL4) | 3.39 | 5.7E-04 | 9.3E-03 |
| 64084 | CLSTN2 | calsyntenin 2(CLSTN2) | 3.19 | 9.5E-04 | 1.3E-02 |
| 5950 | RBP4 | retinol binding protein 4(RBP4) | 3.18 | 2.1E-03 | 2.4E-02 |
| 116159 | CYYR1 | cysteine and tyrosine rich 1(CYYR1) | 3.05 | 4.7E-05 | 1.7E-03 |
| 56000 | NXF3 | nuclear RNA export factor 3(NXF3) | 2.88 | 2.3E-03 | 2.5E-02 |
| 6376 | CX3CL1 | C-X3-C motif chemokine ligand 1(CX3CL1) | 2.85 | 7.6E-05 | 2.4E-03 |
| 222584 | FAM83B | family with sequence similarity 83 member B(FAM83B) | 2.75 | 4.2E-03 | 3.7E-02 |
| 59284 | CACNG7 | calcium voltage-gated channel auxiliary subunit gamma 7(CACNG7) | 2.73 | 4.4E-03 | 3.8E-02 |
| 1278 | COL1A2 | collagen type I alpha 2 chain(COL1A2) | 2.72 | 1.9E-05 | 1.0E-03 |
| 64881 | PCDH20 | protocadherin 20(PCDH20) | 2.59 | 6.3E-06 | 5.0E-04 |
| 100131378 | C11orf91 | chromosome 11 open reading frame 91(C11orf91) | 2.38 | 1.3E-03 | 1.7E-02 |
| 55966 | AJAP1 | adherens junctions associated protein 1(AJAP1) | 2.36 | 1.2E-08 | 1.8E-05 |
| 2044 | EPHA5 | EPH receptor A5(EPHA5) | 2.36 | 7.1E-04 | 1.1E-02 |
| 4148 | MATN3 | matrilin 3(MATN3) | 2.35 | 4.8E-03 | 4.1E-02 |
| 116931 | MED12L | mediator complex subunit 12 like(MED12L) | 2.34 | 4.4E-03 | 3.8E-02 |
| 374897 | SBSN | suprabasin(SBSN) | 2.31 | 5.0E-03 | 4.1E-02 |
| 64093 | SMOC1 | SPARC related modular calcium binding 1(SMOC1) | 2.28 | 1.5E-06 | 2.1E-04 |
| 83481 | EPPK1 | epiplakin 1(EPPK1) | 2.21 | 4.9E-08 | 3.6E-05 |
| 3604 | TNFRSF9 | TNF receptor superfamily member 9(TNFRSF9) | 2.17 | 1.7E-05 | 9.6E-04 |
| 4773 | NFATC2 | nuclear factor of activated T-cells 2(NFATC2) | 2.16 | 7.2E-06 | 5.3E-04 |
| 8676 | STX11 | syntaxin 11(STX11) | 2.16 | 3.4E-07 | 8.4E-05 |
| 79689 | STEAP4 | STEAP4 metalloreductase(STEAP4) | 2.14 | 4.4E-06 | 3.9E-04 |
| 3274 | HRH2 | histamine receptor H1(HRH1) | 2.14 | 1.8E-03 | 2.1E-02 |
| 414236 | C10orf55 | chromosome 10 open reading frame 55(C10orf55) | 2.13 | 4.0E-03 | 3.6E-02 |
| 643733 | LOC643733 | caspase 4, apoptosis-related cysteine peptidase pseudogene(LOC643733) | 2.12 | 5.2E-03 | 4.3E-02 |
| 90853 | SPOCD1 | SPOC domain containing 1(SPOCD1) | 2.09 | 8.7E-07 | 1.4E-04 |
| 60468 | BACH2 | BTB domain and CNC homolog 2(BACH2) | 2.08 | 1.3E-04 | 3.5E-03 |
| 3371 | TNC | tenascin C(TNC) | 2.07 | 6.6E-09 | 1.3E-05 |
| 5999 | RGS4 | regulator of G-protein signaling 4(RGS4) | 2.05 | 2.7E-05 | 1.2E-03 |
| 6781 | STC1 | stanniocalcin 1(STC1) | 2.00 | 4.9E-07 | 1.0E-04 |
| 710 | SERPING1 | serpin family G member 1(SERPING1) | 1.98 | 2.4E-03 | 2.5E-02 |
| 3656 | IRAK2 | inhibin beta E subunit(INHBE) | 1.96 | 1.9E-05 | 1.0E-03 |
| 83716 | CRISPLD2 | cysteine rich secretory protein LCCL domain containing 2(CRISPLD2) | 1.96 | 4.1E-03 | 3.7E-02 |
| 1440 | CSF3 | colony stimulating factor 3(CSF3) | 1.95 | 4.0E-04 | 7.4E-03 |
| 7042 | TGFB2 | transforming growth factor beta 2(TGFB2) | 1.94 | 1.7E-08 | 2.2E-05 |
| 100129518 | LOC100129518 | uncharacterized LOC100129518(LOC100129518) | 1.93 | 1.4E-06 | 2.1E-04 |
| 3383 | ICAM1 | heat shock protein family A (Hsp70) member 6(HSPA6) | 1.91 | 1.8E-07 | 6.2E-05 |
| 10324 | KLHL41 | lysine demethylase 7A(KDM7A) | 1.90 | 2.8E-06 | 2.9E-04 |
| 80853 | KDM7A | potassium voltage-gated channel subfamily Q member 1(KCNQ1) | 1.88 | 2.2E-08 | 2.2E-05 |
| 163732 | CITED4 | Cbp/p300 interacting transactivator with Glu/Asp rich carboxy-terminal domain 4(CITED4) | 1.87 | 2.0E-04 | 4.7E-03 |
| 23034 | SAMD4A | sterile alpha motif domain containing 4A(SAMD4A) | 1.87 | 1.0E-08 | 1.8E-05 |
| 868 | CBLB | Cbl proto-oncogene B(CBLB) | 1.87 | 2.0E-07 | 6.6E-05 |
| 84953 | MICALCL | MICAL C-terminal like(MICALCL) | 1.86 | 9.1E-05 | 2.7E-03 |
| 50944 | SHANK1 | SH3 and multiple ankyrin repeat domains 1(SHANK1) | 1.86 | 3.6E-05 | 1.5E-03 |
| 7185 | TRAF1 | TNF receptor associated factor 1(TRAF1) | 1.82 | 4.4E-05 | 1.7E-03 |
| 5205 | ATP8B1 | ATPase phospholipid transporting 8B1(ATP8B1) | 1.82 | 2.1E-08 | 2.2E-05 |
| 924 | CD7 | CD7 molecule(CD7) | 1.81 | 2.3E-06 | 2.7E-04 |
| 284076 | TTLL6 | tubulin tyrosine ligase like 6(TTLL6) | 1.77 | 1.5E-03 | 1.9E-02 |
| 84879 | MFSD2A | major facilitator superfamily domain containing 2A(MFSD2A) | 1.77 | 2.7E-07 | 7.3E-05 |
| 611 | OPN1SW | opsin 1 (cone pigments), short-wave-sensitive(OPN1SW) | 1.76 | 1.8E-03 | 2.1E-02 |
| 80271 | ITPKC | integrin subunit beta 3(ITGB3) | 1.76 | 5.7E-09 | 1.3E-05 |
| 65249 | ZSWIM4 | zinc finger SWIM-type containing 4(ZSWIM4) | 1.76 | 4.6E-06 | 4.0E-04 |
| 3269 | HRH1 | homeobox A6(HOXA6) | 1.74 | 1.7E-07 | 6.1E-05 |
| 10216 | PRG4 | proteoglycan 4(PRG4) | 1.71 | 6.7E-04 | 1.0E-02 |
| 9173 | IL1RL1 | inhibitor of DNA binding 2, HLH protein(ID2) | 1.70 | 2.8E-05 | 1.3E-03 |
| 199800 | ADM5 | adrenomedullin 5 (putative)(ADM5) | 1.68 | 5.4E-04 | 8.9E-03 |
| 90102 | PHLDB2 | pleckstrin homology like domain family B member 2(PHLDB2) | 1.68 | 1.2E-04 | 3.3E-03 |
| 115330 | GPR146 | G protein-coupled receptor 146(GPR146) | 1.67 | 4.4E-03 | 3.8E-02 |
| 10611 | PDLIM5 | PDZ and LIM domain 5(PDLIM5) | 1.67 | 1.5E-08 | 2.1E-05 |
| 90874 | ZNF697 | zinc finger protein 697(ZNF697) | 1.67 | 1.5E-07 | 6.1E-05 |
| 26279 | PLA2G2D | phospholipase A2 group IID(PLA2G2D) | 1.65 | 1.3E-04 | 3.5E-03 |
| 3096 | HIVEP1 | histone cluster 1 H2B family member g(HIST1H2BG) | 1.65 | 7.8E-04 | 1.2E-02 |
| 84665 | MYPN | myopalladin(MYPN) | 1.65 | 7.1E-08 | 4.2E-05 |
| 6865 | TACR2 | tachykinin receptor 2(TACR2) | 1.64 | 4.1E-03 | 3.7E-02 |
| 3090 | HIC1 | hes related family bHLH transcription factor with YRPW motif 1(HEY1) | 1.63 | 8.7E-07 | 1.4E-04 |
| 6542 | SLC7A2 | solute carrier family 7 member 2(SLC7A2) | 1.61 | 1.4E-07 | 6.1E-05 |
| 79660 | PPP1R3B | protein phosphatase 1 regulatory subunit 3B(PPP1R3B) | 1.60 | 1.5E-07 | 6.1E-05 |
| 27128 | CYTH4 | cytohesin 4(CYTH4) | 1.60 | 2.2E-03 | 2.4E-02 |
| 2700 | GJA3 | gap junction protein alpha 3(GJA3) | 1.58 | 8.0E-06 | 5.7E-04 |
| 6876 | TAGLN | transgelin(TAGLN) | 1.57 | 3.4E-08 | 2.8E-05 |
| 3097 | HIVEP2 | human immunodeficiency virus type I enhancer binding protein 1(HIVEP1) | 1.57 | 3.5E-05 | 1.5E-03 |
| 63827 | BCAN | brevican(BCAN) | 1.56 | 2.2E-05 | 1.1E-03 |
| 59269 | HIVEP3 | human immunodeficiency virus type I enhancer binding protein 2(HIVEP2) | 1.56 | 2.0E-08 | 2.2E-05 |
| 7477 | WNT7B | Wnt family member 7B(WNT7B) | 1.56 | 3.8E-06 | 3.6E-04 |
| 64131 | XYLT1 | xylosyltransferase 1(XYLT1) | 1.56 | 6.0E-05 | 2.1E-03 |
| 4665 | NAB2 | NGFI-A binding protein 2(NAB2) | 1.55 | 3.1E-08 | 2.8E-05 |
| 53942 | CNTN5 | contactin 5(CNTN5) | 1.54 | 1.3E-04 | 3.5E-03 |
| 2706 | GJB2 | gap junction protein beta 2(GJB2) | 1.53 | 2.1E-04 | 4.9E-03 |
| 5971 | RELB | RELB proto-oncogene, NF-kB subunit(RELB) | 1.53 | 2.6E-04 | 5.5E-03 |
| 83875 | BCO2 | beta-carotene oxygenase 2(BCO2) | 1.52 | 4.4E-03 | 3.8E-02 |
| 115265 | DDIT4L | DNA damage inducible transcript 4 like(DDIT4L) | 1.52 | 9.4E-04 | 1.3E-02 |
| 3690 | ITGB3 | interleukin 1 receptor associated kinase 2(IRAK2) | 1.52 | 1.2E-05 | 7.5E-04 |
| 25802 | LMOD1 | leiomodin 1(LMOD1) | 1.51 | 1.1E-04 | 3.0E-03 |
| 57214 | CEMIP | cell migration inducing hyaluronan binding protein(CEMIP) | 1.50 | 1.7E-06 | 2.3E-04 |
| 221833 | SP8 | Sp8 transcription factor(SP8) | -1.51 | 4.6E-03 | 3.9E-02 |
| 3784 | KCNQ1 | potassium voltage-gated channel subfamily J member 11(KCNJ11) | -1.52 | 4.8E-03 | 4.1E-02 |
| 467 | ATF3 | activating transcription factor 3(ATF3) | -1.52 | 3.0E-04 | 6.0E-03 |
| 7857 | SCG2 | secretogranin II(SCG2) | -1.52 | 4.3E-03 | 3.8E-02 |
| 2653 | GCSH | glycine cleavage system protein H(GCSH) | -1.53 | 3.0E-03 | 3.0E-02 |
| 126068 | ZNF441 | zinc finger protein 441(ZNF441) | -1.54 | 3.1E-04 | 6.2E-03 |
| 23779 | ARHGAP8 | Rho GTPase activating protein 8(ARHGAP8) | -1.54 | 2.8E-03 | 2.9E-02 |
| 5507 | PPP1R3C | protein phosphatase 1 regulatory subunit 3C(PPP1R3C) | -1.57 | 5.5E-07 | 1.0E-04 |
| 9572 | NR1D1 | nuclear receptor subfamily 1 group D member 1(NR1D1) | -1.59 | 1.1E-09 | 5.4E-06 |
| 100129722 | STPG3-AS1 | STPG3 antisense RNA 1(STPG3-AS1) | -1.60 | 4.9E-03 | 4.1E-02 |
| 344887 | NMRAL2P | NmrA like redox sensor 2, pseudogene(NMRAL2P) | -1.60 | 5.0E-04 | 8.6E-03 |
| 116039 | OSR2 | odd-skipped related transciption factor 2(OSR2) | -1.61 | 7.8E-04 | 1.2E-02 |
| 3818 | KLKB1 | kelch like family member 41(KLHL41) | -1.62 | 4.1E-03 | 3.7E-02 |
| 137209 | ZNF572 | zinc finger protein 572(ZNF572) | -1.63 | 3.6E-03 | 3.3E-02 |
| 10008 | KCNE3 | inositol-trisphosphate 3-kinase C(ITPKC) | -1.63 | 4.2E-03 | 3.7E-02 |
| 83729 | INHBE | interleukin 1 receptor like 1(IL1RL1) | -1.64 | 1.9E-03 | 2.2E-02 |
| 285629 | LINC02159 | kallikrein B1(KLKB1) | -1.65 | 4.1E-03 | 3.7E-02 |
| 816 | CAMK2B | calcium/calmodulin dependent protein kinase II beta(CAMK2B) | -1.66 | 1.2E-03 | 1.6E-02 |
| 286333 | FAM225A | family with sequence similarity 225 member A (non-protein coding)(FAM225A) | -1.66 | 5.0E-03 | 4.1E-02 |
| 4634 | MYL3 | myosin light chain 3(MYL3) | -1.68 | 7.6E-05 | 2.4E-03 |
| 3198 | HOXA1 | human immunodeficiency virus type I enhancer binding protein 3(HIVEP3) | -1.68 | 1.5E-03 | 1.9E-02 |
| 9172 | MYOM2 | myomesin 2(MYOM2) | -1.68 | 1.6E-03 | 1.9E-02 |
| 400258 | C14orf180 | chromosome 14 open reading frame 180(C14orf180) | -1.69 | 5.3E-03 | 4.3E-02 |
| 26050 | SLITRK5 | SLIT and NTRK like family member 5(SLITRK5) | -1.70 | 1.0E-04 | 2.9E-03 |
| 23462 | HEY1 | hypophosphatemic bone disease(HBD) | -1.70 | 5.4E-06 | 4.5E-04 |
| 3767 | KCNJ11 | potassium voltage-gated channel subfamily E regulatory subunit 3(KCNE3) | -1.71 | 6.9E-04 | 1.1E-02 |
| 100129792 | CCDC152 | coiled-coil domain containing 152(CCDC152) | -1.71 | 6.5E-04 | 1.0E-02 |
| 84206 | MEX3B | mex-3 RNA binding family member B(MEX3B) | -1.73 | 1.2E-06 | 1.8E-04 |
| 245711 | SPDYA | speedy/RINGO cell cycle regulator family member A(SPDYA) | -1.85 | 1.7E-03 | 2.0E-02 |
| 4607 | MYBPC3 | myosin binding protein C, cardiac(MYBPC3) | -1.86 | 1.0E-04 | 2.9E-03 |
| 3203 | HOXA6 | homeobox A1(HOXA1) | -1.87 | 6.6E-04 | 1.0E-02 |
| 641364 | SLC7A11-AS1 | SLC7A11 antisense RNA 1(SLC7A11-AS1) | -1.89 | 4.2E-03 | 3.7E-02 |
| 7139 | TNNT2 | troponin T2, cardiac type(TNNT2) | -1.91 | 4.3E-05 | 1.7E-03 |
| 85001 | MGC16275 | uncharacterized protein MGC16275(MGC16275) | -1.93 | 2.9E-03 | 2.9E-02 |
| 387640 | SKIDA1 | SKI/DACH domain containing 1(SKIDA1) | -1.93 | 6.8E-05 | 2.2E-03 |
| 3045 | HBD | hemoglobin subunit delta(HBD) | -1.95 | 3.0E-03 | 3.0E-02 |
| 100129716 | ARRDC3-AS1 | ARRDC3 antisense RNA 1(ARRDC3-AS1) | -1.96 | 3.1E-04 | 6.2E-03 |
| 8339 | HIST1H2BG | HIC ZBTB transcriptional repressor 1(HIC1) | -1.97 | 3.4E-03 | 3.2E-02 |
| 88 | ACTN2 | actinin alpha 2(ACTN2) | -2.00 | 3.0E-04 | 6.0E-03 |
| 4625 | MYH7 | myosin heavy chain 7(MYH7) | -2.01 | 1.7E-05 | 9.7E-04 |
| 407013 | MIR24-2 | microRNA 24-2(MIR24-2) | -2.01 | 2.8E-08 | 2.6E-05 |
| 79365 | BHLHE41 | basic helix-loop-helix family member e41(BHLHE41) | -2.09 | 4.9E-09 | 1.3E-05 |
| 4633 | MYL2 | myosin light chain 2(MYL2) | -2.11 | 3.6E-05 | 1.5E-03 |
| 70 | ACTC1 | actin, alpha, cardiac muscle 1(ACTC1) | -2.14 | 1.5E-06 | 2.1E-04 |
| 6280 | S100A9 | S100 calcium binding protein A9(S100A9) | -2.15 | 3.4E-04 | 6.6E-03 |
| 286530 | P2RY8 | purinergic receptor P2Y8(P2RY8) | -2.17 | 1.8E-04 | 4.4E-03 |
| 54209 | TREM2 | triggering receptor expressed on myeloid cells 2(TREM2) | -2.23 | 6.8E-04 | 1.0E-02 |
| 4624 | MYH6 | myosin heavy chain 6(MYH6) | -2.28 | 4.5E-07 | 9.9E-05 |
| 4804 | NGFR | nerve growth factor receptor(NGFR) | -2.28 | 1.5E-07 | 6.1E-05 |
| 23237 | ARC | activity regulated cytoskeleton associated protein(ARC) | -2.29 | 2.2E-05 | 1.1E-03 |
| 3398 | ID2 | intercellular adhesion molecule 1(ICAM1) | -2.80 | 4.5E-09 | 1.3E-05 |
| 8912 | CACNA1H | calcium voltage-gated channel subunit alpha1 H(CACNA1H) | -3.29 | 2.3E-05 | 1.1E-03 |
| 10912 | GADD45G | growth arrest and DNA damage inducible gamma(GADD45G) | -3.30 | 3.5E-10 | 5.0E-06 |
| 338821 | SLCO1B7 | solute carrier organic anion transporter family member 1B7 (putative)(SLCO1B7) | -3.91 | 4.3E-03 | 3.8E-02 |
| 100532736 | MINOS1-NBL1 | MINOS1-NBL1 readthrough(MINOS1-NBL1) | -4.77 | 3.4E-04 | 6.7E-03 |
| 3310 | HSPA6 | histamine receptor H2(HRH2) | -4.95 | 1.1E-09 | 5.4E-06 |
| 100533483 | DYX1C1-CCPG1 | DYX1C1-CCPG1 readthrough (NMD candidate)(DYX1C1-CCPG1) | -6.18 | 5.8E-03 | 4.6E-02 |

| **Table S3. Extended list of top 30 enriched pathways in Ctrl vs fibroblast co-culture** | | | |
| --- | --- | --- | --- |
|  |  |  |  | |
| **ID** | **Term** | **Adj.P** | **Genes** | |
| path:hsa05200 | Pathways in cancer | 2.0E-38 | ITGA3,RALA,HGF,BIRC3,FAS,TRAF1,LAMC2,RASSF1,NFKB2,FGFR1,COL4A4,GSK3B,LAMB1,TGFB2,ABL1,HIF1A,AXIN1,CDK6,MET,CCDC6,NFKB1,BIRC2,CBL,PPARD,E2F3,WNT5A,CBLB,EPAS1,GNA13,CDKN1A,BMP2,STAT5A,TRAF3,RARA,PPARG,COL4A2,ETS1,EGLN1,LAMC1,ITGAV,IGF1R,PML,SMAD4,ITGB1,VEGFC,BRAF,SMAD3,NKX3-1,CRK,BDKRB2,STAT3,CXCL8,BCL2L1,RELA,TRAF6,BCR,COL4A1,WNT7B,COL4A5,ARHGEF12,PDGFA,LPAR1,RASSF5 | |
| path:hsa04510 | Focal adhesion | 8.6E-38 | ITGA3,HGF,BIRC3,VCL,TNC,BCAR1,LAMC2,PPP1R12A,MYLK,ACTN1,COL4A4,GSK3B,LAMB1,MYL9,MYL12A,CAV2,MET,COL1A1,BIRC2,VASP,ELK1,ACTN4,VAV3,COL4A2,ITGA7,LAMC1,FLNB,THBS1,ITGAV,IGF1R,COL6A2,ITGB1,VEGFC,BRAF,ZYX,ITGA5,COL6A3,COL1A2,ILK,CRK,PDGFD,ACTG1,PIP5K1C,COL4A1,COL4A5,FLNA,SRC,PDGFA,ITGB3 | |
| path:hsa04151 | PI3K-Akt signaling pathway | 1.1E-26 | ITGA3,HGF,TNC,LAMC2,PPP2R3A,IL4R,FGFR1,COL4A4,PHLPP1,GSK3B,LAMB1,CDK6,MET,CSF3,COL1A1,NFKB1,CDKN1A,YWHAH,COL4A2,ITGA7,LAMC1,TLR2,THBS1,ITGAV,IGF1R,COL6A2,OSMR,CREB5,ITGB1,VEGFC,CRTC2,ITGA5,COL6A3,COL1A2,IL7R,EFNA1,PDGFD,INSR,BCL2L1,RELA,CREB3L2,COL4A1,COL4A5,PDGFA,LPAR1,ITGB3 | |
| path:hsa05165 | Human papillomavirus infection | 6.6E-26 | ITGA3,FAS,TNC,LAMC2,PPP2R3A,NOTCH3,PSEN1,COL4A4,GSK3B,LAMB1,JAG1,AXIN1,CDK6,COL1A1,HDAC5,NFKB1,CSNK1A1,WNT5A,CDKN1A,IRF1,TICAM1,TRAF3,NOTCH2,COL4A2,ITGA7,LAMC1,THBS1,ITGAV,COL6A2,CREB5,ITGB1,MAGI1,ITGA5,COL6A3,COL1A2,RELA,CREB3L2,MAML2,COL4A1,WNT7B,COL4A5,HES4,HLA-E,IRF9,HLA-B,ITGB3 | |
| path:hsa05205 | Proteoglycans in cancer | 2.2E-25 | PLAUR,HGF,FAS,CD44,PPP1R12A,FGFR1,TGFB2,TIMP3,HIF1A,CAV2,MET,CBL,WNT5A,CBLB,PLAU,SDC4,CDKN1A,ELK1,CTSL,FLNB,TLR2,THBS1,ITGAV,IGF1R,IQGAP1,MSN,ITGB1,TIAM1,BRAF,ITGA5,FRS2,STAT3,ACTG1,WNT7B,ARHGEF12,FLNA,SRC,ITGB3 | |
| path:hsa04810 | Regulation of actin cytoskeleton | 7.1E-25 | ITGA3,VCL,BCAR1,PPP1R12A,MYLK,ACTN1,FGFR1,SSH1,MYH9,MYL9,MYL12A,WASL,GNA13,ACTN4,VAV3,ITGA7,ARHGEF4,ITGAV,IQGAP1,PIP5K1A,MSN,GSN,ITGB1,ENAH,TIAM1,BRAF,ITGA5,CRK,BDKRB2,PDGFD,BAIAP2,SPATA13,ACTG1,PIP5K1C,ARHGEF12,SRC,PDGFA,ITGB3 | |
| path:hsa04512 | ECM-receptor interaction | 3.9E-20 | ITGA3,CD44,TNC,LAMC2,COL4A4,LAMB1,COL1A1,SDC4,COL4A2,ITGA7,LAMC1,THBS1,ITGAV,COL6A2,ITGB1,ITGA5,COL6A3,COL1A2,COL4A1,COL4A5,CD47,ITGB3 | |
| path:hsa04060 | Cytokine-cytokine receptor interaction | 8.0E-20 | CX3CL1,TNFRSF12A,HGF,FAS,TNFRSF9,IL4R,TGFB2,TNFRSF10A,MET,CSF3,ACVR1,IL1R1,IL18R1,TNFRSF10B,BMP2,IL6ST,OSMR,VEGFC,IL18,CXCL13,IFNGR2,CXCL1,IL7R,CXCL8,TNFRSF10D,CLCF1,PDGFA,PLEKHO2,CCL5 | |
| path:hsa04520 | Adherens junction | 3.0E-19 | VCL,ACTN1,FGFR1,SORBS1,TJP1,MET,WASL,NECTIN2,AFDN,ACTN4,IGF1R,IQGAP1,SMAD4,PTPRF,SMAD3,INSR,PTPRM,BAIAP2,YES1,ACTG1,PTPN1,SRC | |
| path:hsa04015 | Rap1 signaling pathway | 6.5E-19 | RALA,HGF,MAP2K3,BCAR1,FGFR1,MET,SIPA1L2,VASP,ADORA2A,DOCK4,AFDN,THBS1,IGF1R,ITGB1,VEGFC,MAGI1,TIAM1,BRAF,CRK,EFNA1,PDGFD,FPR1,INSR,ACTG1,SRC,PDGFA,SIPA1L1,LPAR1,SIPA1,ITGB3,RASSF5 | |
| path:hsa05206 | MicroRNAs in cancer | 4.2E-18 | VIM,CD44,TNC,RASSF1,NOTCH3,TGFB2,SIRT1,ABL1,TIMP3,CDK6,MET,NFKB1,E2F3,FOXP1,GLS,PLAU,CDKN1A,NOTCH2,THBS1,SLC7A1,TPM1,ZEB1,HMGA2,ITGA5,CRK,STAT3,IRS2,PDGFA,ITGB3 | |
| path:hsa04668 | TNF signaling pathway | 4.2E-17 | CFLAR,CX3CL1,BIRC3,FAS,MAP2K3,TRAF1,ITCH,ICAM1,JAG1,MAP3K8,NFKB1,BIRC2,IL18R1,TRAF3,CREB5,VEGFC,MMP14,CXCL1,CEBPB,RELA,CREB3L2,SOCS3,MAP3K5,CCL5 | |
| path:hsa04530 | Tight junction | 6.3E-17 | NEDD4L,YBX3,NEDD4,ACTN1,MYH9,MYL9,MYL12A,TJP1,WASL,PRKAG2,AMOTL2,ACTR3,TJP2,VASP,AFDN,ACTN4,ARHGAP17,MSN,ITGB1,MAGI1,TIAM1,AMOTL1,SYNPO,ACTG1,SRC,MAP3K5 | |
| path:hsa05146 | Amoebiasis | 5.5E-16 | VCL,LAMC2,GNA15,ACTN1,COL4A4,LAMB1,TGFB2,COL1A1,NFKB1,IL1R1,ACTN4,COL4A2,LAMC1,TLR2,CXCL1,COL1A2,CXCL8,RELA,COL4A1,COL4A5 | |
| path:hsa05164 | Influenza A | 8.2E-16 | FAS,MAP2K3,GSK3B,ICAM1,DNAJC3,TNFRSF10A,DDX58,NFKB1,TNFRSF10B,TICAM1,CASP1,PML,FURIN,NXF3,IL18,IFNGR2,CXCL8,EIF2AK3,RELA,TNFRSF10D,AGFG1,ACTG1,SOCS3,IRF9,CCL5 | |
| path:hsa04360 | Axon guidance | 8.3E-16 | NTN4,SEMA3A,SEMA3C,GSK3B,SSH1,ABL1,NFATC2,MET,SEMA5A,WNT5A,PLXNA1,PPP3CC,EFNB2,PLXNA3,TRPC4,EPHB2,SLIT2,EPHA5,ITGB1,ENAH,ILK,SEMA4C,EFNA1,ROBO1,ARHGEF12,SRC,L1CAM | |
| path:hsa05222 | Small cell lung cancer | 2.6E-15 | ITGA3,BIRC3,TRAF1,LAMC2,COL4A4,LAMB1,CDK6,NFKB1,BIRC2,E2F3,CDKN1A,TRAF3,COL4A2,LAMC1,ITGAV,ITGB1,BCL2L1,RELA,TRAF6,COL4A1,COL4A5 | |
| path:hsa05202 | Transcriptional misregulation in cancer | 2.7E-15 | BIRC3,TRAF1,DOT1L,MET,NFKB1,BCL6,PLAU,CDKN1A,SIX1,RARA,PPARG,ETV6,IGF1R,PML,ZEB1,HMGA2,REL,SIN3A,CXCL8,BCL2L1,JMJD1C,CEBPB,AFF1,RELA,PDGFA | |
| path:hsa04974 | Protein digestion and absorption | 3.3E-15 | COL5A3,COL4A4,COL1A1,COL12A1,COL5A1,SLC38A2,COL4A2,COL6A2,ATP1B1,COL6A3,COL1A2,COL18A1,COL4A1,COL14A1,COL4A5,MME,COL5A2 | |
| path:hsa05203 | Viral carcinogenesis | 6.4E-15 | TRAF1,ACTN1,NFKB2,CDK6,HDAC5,NFKB1,SRF,CDKN1A,STAT5A,YWHAH,ACTN4,TRAF3,IL6ST,PMAIP1,CREB5,GSN,RASA2,MAPKAPK2,REL,STAT3,RELA,CREB3L2,SRC,HLA-E,IRF9,DDX3X,HLA-B | |
| path:hsa04144 | Endocytosis | 1.3E-14 | NEDD4L,NEDD4,EPN2,ITCH,SH3GLB1,CYTH4,EEA1,EHD4,CAV2,WASL,EHD1,CBL,CBLB,WIPF1,IGF1R,PML,PIP5K1A,ASAP2,DAB2,ASAP1,PSD3,SMAD3,VPS37C,KIF5B,TRAF6,PIP5K1C,SRC,SMURF1,HLA-E,HLA-B,ARFGAP3 | |
| path:hsa04390 | Hippo signaling pathway | 2.5E-14 | TEAD3,WWTR1,TGFB2,AXIN1,WWC1,WNT5A,BMP2,YWHAH,YAP1,FRMD6,SMAD4,LATS2,ACTG1,TEAD1 | |
| path:hsa04621 | NOD-like receptor signaling pathway | 3.0E-14 | BIRC3,NLRP1,MEFV,RIPK2,NAMPT,NFKB1,PANX1,BIRC2,GBP1,TICAM1,TRAF3,TANK,CASP1,IL18,CXCL1,CTSB,CXCL8,BCL2L1,RELA,TRAF6,CASP4,CARD16,IRF9,CCL5 | |
| path:hsa05166 | HTLV-I infection | 6.6E-14 | NFKB2,GSK3B,ICAM1,TGFB2,CREM,XBP1,NFATC2,RELB,NFKB1,E2F3,SRF,WNT5A,IL1R1,PPP3CC,CDKN1A,STAT5A,ELK1,ETS1,CRTC3,SMAD4,ETS2,CRTC2,SMAD3,BCL2L1,RELA,WNT7B,PDGFA,HLA-E,HLA-B | |
| path:hsa04014 | Ras signaling pathway | 9.5E-14 | RALA,HGF,RASSF1,RASAL2,FGFR1,ABL1,MET,NFKB1,PLA2G2D,ELK1,AFDN,ETS1,IGF1R,ABL2,VEGFC,RASA2,TIAM1,ETS2,REL,EFNA1,PDGFD,INSR,BCL2L1,RELA,PDGFA,RASSF5 | |
| path:hsa04064 | NF-kappa B signaling pathway | 2.1E-13 | CFLAR,BIRC3,TRAF1,NFKB2,ICAM1,CARD10,RELB,DDX58,NFKB1,BIRC2,IL1R1,PLAU,TICAM1,TRAF3,CXCL8,BCL2L1,RELA,TRAF6 | |
| path:hsa04010 | MAPK signaling pathway | 3.0E-13 | FAS,MAP2K3,NFKB2,FGFR1,TGFB2,RELB,CACNG7,MAP3K8,DUSP3,NFKB1,DUSP16,SRF,IL1R1,PPP3CC,ELK1,FLNB,RASA2,CACNA2D3,BRAF,MAPKAPK2,DUSP7,CRK,MAP3K2,RELA,TRAF6,FLNA,MAP3K5,PDGFA | |
| path:hsa04022 | cGMP-PKG signaling pathway | 1.8E-12 | GTF2IRD1,PPP1R12A,ATP2B4,MYLK,ATP2B1,NFATC2,MYL9,SRF,MEF2D,GNA13,PPP3CC,VASP,ATP1B1,CREB5,ATP2B2,BDKRB2,INSR,ATP2A2,CREB3L2,PRKG1,IRS2 | |
| path:hsa05410 | Hypertrophic cardiomyopathy (HCM) | 3.5E-12 |  | |
| path:hsa05161 | Hepatitis B | 5.1E-12 | FAS,TGFB2,NFATC2,CDK6,DDX58,NFKB1,E2F3,CDKN1A,STAT5A,ELK1,TICAM1,TLR2,SMAD4,CREB5,SMAD3,STAT3,CXCL8,RELA,CREB3L2,SRC,DDX3X | |

| **Table S4. List of differentially expressed genes between Ctrl and NF co-cultures** | | |  |  |  |
| --- | --- | --- | --- | --- | --- |
|  |  |  |  |  |  |
|  |  |  |  |  |  |
|  |  |  |  |  |  |
| **Gene ID** | **Gene Symbol** | **Description** | **Log2(fold change) CAF/Ctrl** | **p-value** | **FDR** |
|
|
| 100302652 | GPR75-ASB3 | GPR75-ASB3 readthrough(GPR75-ASB3) | 10.09 | 1.8E-04 | 7.2E-03 |
| 1041 | CDSN | corneodesmosin(CDSN) | 7.08 | 1.5E-03 | 3.0E-02 |
| 8745 | ADAM23 | ADAM metallopeptidase domain 23(ADAM23) | 7.04 | 8.6E-04 | 2.0E-02 |
| 10563 | CXCL13 | C-X-C motif chemokine ligand 13(CXCL13) | 4.39 | 6.3E-04 | 1.6E-02 |
| 79931 | TNIP3 | TNFAIP3 interacting protein 3(TNIP3) | 4.09 | 5.3E-05 | 3.2E-03 |
| 400541 | LOC400541 | uncharacterized LOC400541(LOC400541) | 3.89 | 1.6E-03 | 3.1E-02 |
| 145741 | C2CD4A | C2 calcium dependent domain containing 4A(C2CD4A) | 3.79 | 2.6E-03 | 4.2E-02 |
| 165904 | XIRP1 | xin actin binding repeat containing 1(XIRP1) | 3.62 | 4.5E-05 | 2.9E-03 |
| 348938 | NIPAL4 | NIPA like domain containing 4(NIPAL4) | 3.36 | 1.4E-03 | 2.8E-02 |
| 6376 | CX3CL1 | C-X3-C motif chemokine ligand 1(CX3CL1) | 3.23 | 5.9E-05 | 3.5E-03 |
| 116159 | CYYR1 | cysteine and tyrosine rich 1(CYYR1) | 3.04 | 1.2E-04 | 5.6E-03 |
| 1278 | COL1A2 | collagen type I alpha 2 chain(COL1A2) | 3.03 | 1.7E-05 | 1.6E-03 |
| 79689 | STEAP4 | STEAP4 metalloreductase(STEAP4) | 2.63 | 1.8E-06 | 3.6E-04 |
| 1440 | CSF3 | colony stimulating factor 3(CSF3) | 2.34 | 2.3E-04 | 8.4E-03 |
| 83481 | EPPK1 | epiplakin 1(EPPK1) | 2.33 | 8.9E-08 | 8.4E-05 |
| 3383 | ICAM1 | intercellular adhesion molecule 1(ICAM1) | 2.26 | 1.2E-07 | 8.5E-05 |
| 64881 | PCDH20 | protocadherin 20(PCDH20) | 2.26 | 6.8E-05 | 3.9E-03 |
| 64093 | SMOC1 | SPARC related modular calcium binding 1(SMOC1) | 2.26 | 4.5E-06 | 6.5E-04 |
| 84879 | MFSD2A | major facilitator superfamily domain containing 2A(MFSD2A) | 2.18 | 1.2E-07 | 8.5E-05 |
| 7185 | TRAF1 | TNF receptor associated factor 1(TRAF1) | 2.17 | 2.8E-05 | 2.1E-03 |
| 55966 | AJAP1 | adherens junctions associated protein 1(AJAP1) | 2.14 | 9.9E-08 | 8.5E-05 |
| 8676 | STX11 | syntaxin 11(STX11) | 2.13 | 1.2E-06 | 3.0E-04 |
| 3604 | TNFRSF9 | TNF receptor superfamily member 9(TNFRSF9) | 2.11 | 6.6E-05 | 3.8E-03 |
| 3371 | TNC | tenascin C(TNC) | 2.10 | 1.7E-08 | 6.0E-05 |
| 6781 | STC1 | stanniocalcin 1(STC1) | 2.08 | 9.4E-07 | 2.8E-04 |
| 3656 | IRAK2 | interleukin 1 receptor associated kinase 2(IRAK2) | 2.05 | 3.3E-05 | 2.4E-03 |
| 284076 | TTLL6 | tubulin tyrosine ligase like 6(TTLL6) | 2.04 | 1.4E-03 | 2.7E-02 |
| 9173 | IL1RL1 | interleukin 1 receptor like 1(IL1RL1) | 2.03 | 1.9E-05 | 1.7E-03 |
| 611 | OPN1SW | opsin 1 (cone pigments), short-wave-sensitive(OPN1SW) | 2.02 | 1.6E-03 | 3.1E-02 |
| 1117 | CHI3L2 | chitinase 3 like 2(CHI3L2) | 2.02 | 3.2E-03 | 4.7E-02 |
| 163732 | CITED4 | Cbp/p300 interacting transactivator with Glu/Asp rich carboxy-terminal domain 4(CITED4) | 2.01 | 3.0E-04 | 1.0E-02 |
| 5999 | RGS4 | regulator of G-protein signaling 4(RGS4) | 2.01 | 9.0E-05 | 4.4E-03 |
| 100129518 | LOC100129518 | uncharacterized LOC100129518(LOC100129518) | 2.00 | 2.8E-06 | 4.7E-04 |
| 80271 | ITPKC | inositol-trisphosphate 3-kinase C(ITPKC) | 1.96 | 6.8E-09 | 3.2E-05 |
| 2919 | CXCL1 | C-X-C motif chemokine ligand 1(CXCL1) | 1.95 | 2.0E-05 | 1.7E-03 |
| 7042 | TGFB2 | transforming growth factor beta 2(TGFB2) | 1.94 | 5.6E-08 | 7.9E-05 |
| 84953 | MICALCL | MICAL C-terminal like(MICALCL) | 1.89 | 2.4E-04 | 8.5E-03 |
| 80853 | KDM7A | lysine demethylase 7A(KDM7A) | 1.89 | 7.2E-08 | 7.9E-05 |
| 4773 | NFATC2 | nuclear factor of activated T-cells 2(NFATC2) | 1.85 | 4.9E-05 | 3.0E-03 |
| 6542 | SLC7A2 | solute carrier family 7 member 2(SLC7A2) | 1.84 | 1.4E-07 | 9.3E-05 |
| 23034 | SAMD4A | sterile alpha motif domain containing 4A(SAMD4A) | 1.82 | 4.4E-08 | 7.9E-05 |
| 6004 | RGS16 | regulator of G-protein signaling 16(RGS16) | 1.81 | 1.7E-06 | 3.5E-04 |
| 5205 | ATP8B1 | ATPase phospholipid transporting 8B1(ATP8B1) | 1.81 | 7.3E-08 | 7.9E-05 |
| 60468 | BACH2 | BTB domain and CNC homolog 2(BACH2) | 1.80 | 1.1E-03 | 2.3E-02 |
| 868 | CBLB | Cbl proto-oncogene B(CBLB) | 1.79 | 9.3E-07 | 2.8E-04 |
| 6876 | TAGLN | transgelin(TAGLN) | 1.78 | 3.8E-08 | 7.9E-05 |
| 65249 | ZSWIM4 | zinc finger SWIM-type containing 4(ZSWIM4) | 1.77 | 1.3E-05 | 1.3E-03 |
| 90853 | SPOCD1 | SPOC domain containing 1(SPOCD1) | 1.77 | 1.4E-05 | 1.4E-03 |
| 90102 | PHLDB2 | pleckstrin homology like domain family B member 2(PHLDB2) | 1.74 | 2.1E-04 | 8.0E-03 |
| 3269 | HRH1 | histamine receptor H1(HRH1) | 1.74 | 5.6E-07 | 2.0E-04 |
| 90874 | ZNF697 | zinc finger protein 697(ZNF697) | 1.71 | 4.4E-07 | 1.9E-04 |
| 3090 | HIC1 | HIC ZBTB transcriptional repressor 1(HIC1) | 1.70 | 2.0E-06 | 3.8E-04 |
| 10216 | PRG4 | proteoglycan 4(PRG4) | 1.69 | 1.9E-03 | 3.5E-02 |
| 10865 | ARID5A | AT-rich interaction domain 5A(ARID5A) | 1.68 | 3.5E-06 | 5.6E-04 |
| 10611 | PDLIM5 | PDZ and LIM domain 5(PDLIM5) | 1.68 | 4.9E-08 | 7.9E-05 |
| 387763 | C11orf96 | chromosome 11 open reading frame 96(C11orf96) | 1.65 | 2.5E-06 | 4.4E-04 |
| 1052 | CEBPD | CCAAT/enhancer binding protein delta(CEBPD) | 1.64 | 2.8E-07 | 1.5E-04 |
| 4665 | NAB2 | NGFI-A binding protein 2(NAB2) | 1.63 | 7.0E-08 | 7.9E-05 |
| 924 | CD7 | CD7 molecule(CD7) | 1.62 | 2.2E-05 | 1.8E-03 |
| 79660 | PPP1R3B | protein phosphatase 1 regulatory subunit 3B(PPP1R3B) | 1.61 | 4.9E-07 | 1.9E-04 |
| 7097 | TLR2 | toll like receptor 2(TLR2) | 1.60 | 8.7E-07 | 2.7E-04 |
| 2357 | FPR1 | formyl peptide receptor 1(FPR1) | 1.59 | 1.9E-03 | 3.4E-02 |
| 4837 | NNMT | nicotinamide N-methyltransferase(NNMT) | 1.57 | 2.8E-07 | 1.5E-04 |
| 8793 | TNFRSF10D | TNF receptor superfamily member 10d(TNFRSF10D) | 1.56 | 2.6E-05 | 2.0E-03 |
| 5971 | RELB | RELB proto-oncogene, NF-kB subunit(RELB) | 1.55 | 5.3E-04 | 1.4E-02 |
| 29126 | CD274 | CD274 molecule(CD274) | 1.55 | 3.3E-05 | 2.4E-03 |
| 374 | AREG | amphiregulin(AREG) | 1.55 | 1.6E-05 | 1.5E-03 |
| 57214 | CEMIP | cell migration inducing hyaluronan binding protein(CEMIP) | 1.53 | 5.2E-06 | 7.1E-04 |
| 3690 | ITGB3 | integrin subunit beta 3(ITGB3) | 1.52 | 3.8E-05 | 2.6E-03 |
| 2643 | GCH1 | GTP cyclohydrolase 1(GCH1) | 1.52 | 1.4E-05 | 1.4E-03 |
| 84206 | MEX3B | mex-3 RNA binding family member B(MEX3B) | -1.51 | 4.6E-05 | 2.9E-03 |
| 84107 | ZIC4 | Zic family member 4(ZIC4) | -1.58 | 2.2E-03 | 3.8E-02 |
| 10365 | KLF2 | Kruppel like factor 2(KLF2) | -1.59 | 7.3E-07 | 2.4E-04 |
| 3773 | KCNJ16 | potassium voltage-gated channel subfamily J member 16(KCNJ16) | -1.60 | 2.7E-03 | 4.3E-02 |
| 28514 | DLL1 | delta like canonical Notch ligand 1(DLL1) | -1.72 | 1.3E-03 | 2.6E-02 |
| 4634 | MYL3 | myosin light chain 3(MYL3) | -1.75 | 5.2E-04 | 1.4E-02 |
| 126068 | ZNF441 | zinc finger protein 441(ZNF441) | -1.83 | 7.7E-04 | 1.9E-02 |
| 9572 | NR1D1 | nuclear receptor subfamily 1 group D member 1(NR1D1) | -1.83 | 5.2E-09 | 3.2E-05 |
| 23462 | HEY1 | hes related family bHLH transcription factor with YRPW motif 1(HEY1) | -1.84 | 3.5E-05 | 2.5E-03 |
| 100129716 | ARRDC3-AS1 | ARRDC3 antisense RNA 1(ARRDC3-AS1) | -1.91 | 2.8E-03 | 4.4E-02 |
| 5507 | PPP1R3C | protein phosphatase 1 regulatory subunit 3C(PPP1R3C) | -1.94 | 1.2E-06 | 3.1E-04 |
| 83882 | TSPAN10 | tetraspanin 10(TSPAN10) | -1.95 | 2.9E-03 | 4.4E-02 |
| 7139 | TNNT2 | troponin T2, cardiac type(TNNT2) | -1.98 | 3.6E-04 | 1.1E-02 |
| 344887 | NMRAL2P | NmrA like redox sensor 2, pseudogene(NMRAL2P) | -1.99 | 9.4E-04 | 2.2E-02 |
| 387640 | SKIDA1 | SKI/DACH domain containing 1(SKIDA1) | -2.00 | 5.4E-04 | 1.5E-02 |
| 4607 | MYBPC3 | myosin binding protein C, cardiac(MYBPC3) | -2.04 | 5.3E-04 | 1.4E-02 |
| 286530 | P2RY8 | purinergic receptor P2Y8(P2RY8) | -2.05 | 2.3E-03 | 3.9E-02 |
| 3203 | HOXA6 | homeobox A6(HOXA6) | -2.08 | 2.5E-03 | 4.1E-02 |
| 3767 | KCNJ11 | potassium voltage-gated channel subfamily J member 11(KCNJ11) | -2.19 | 1.1E-03 | 2.4E-02 |
| 88 | ACTN2 | actinin alpha 2(ACTN2) | -2.21 | 1.4E-03 | 2.7E-02 |
| 4804 | NGFR | nerve growth factor receptor(NGFR) | -2.25 | 3.1E-06 | 5.0E-04 |
| 79365 | BHLHE41 | basic helix-loop-helix family member e41(BHLHE41) | -2.29 | 4.4E-08 | 7.9E-05 |
| 4633 | MYL2 | myosin light chain 2(MYL2) | -2.29 | 2.4E-04 | 8.6E-03 |
| 4625 | MYH7 | myosin heavy chain 7(MYH7) | -2.33 | 6.9E-05 | 3.9E-03 |
| 70 | ACTC1 | actin, alpha, cardiac muscle 1(ACTC1) | -2.40 | 9.8E-06 | 1.1E-03 |
| 100129726 | LINC01126 | long intergenic non-protein coding RNA 1126(LINC01126) | -2.40 | 2.6E-03 | 4.2E-02 |
| 23237 | ARC | activity regulated cytoskeleton associated protein(ARC) | -2.40 | 1.4E-04 | 6.2E-03 |
| 3818 | KLKB1 | kallikrein B1(KLKB1) | -2.41 | 2.7E-03 | 4.2E-02 |
| 816 | CAMK2B | calcium/calmodulin dependent protein kinase II beta(CAMK2B) | -2.46 | 7.9E-04 | 1.9E-02 |
| 407013 | MIR24-2 | microRNA 24-2(MIR24-2) | -2.49 | 8.6E-08 | 8.4E-05 |
| 4624 | MYH6 | myosin heavy chain 6(MYH6) | -2.49 | 4.0E-06 | 6.0E-04 |
| 3398 | ID2 | inhibitor of DNA binding 2, HLH protein(ID2) | -2.60 | 2.2E-07 | 1.3E-04 |
| 54209 | TREM2 | triggering receptor expressed on myeloid cells 2(TREM2) | -3.12 | 8.6E-04 | 2.0E-02 |
| 10912 | GADD45G | growth arrest and DNA damage inducible gamma(GADD45G) | -3.62 | 5.7E-09 | 3.2E-05 |
| 8912 | CACNA1H | calcium voltage-gated channel subunit alpha1 H(CACNA1H) | -4.27 | 8.4E-05 | 4.3E-03 |
| 3310 | HSPA6 | heat shock protein family A (Hsp70) member 6(HSPA6) | -5.00 | 5.3E-08 | 7.9E-05 |
| 338821 | SLCO1B7 | solute carrier organic anion transporter family member 1B7 (putative)(SLCO1B7) | -7.00 | 2.4E-03 | 4.0E-02 |
| 100532736 | MINOS1-NBL1 | MINOS1-NBL1 readthrough(MINOS1-NBL1) | -8.36 | 2.5E-04 | 8.7E-03 |

| **Table S5. List of differentially expressed genes between Ctrl and CAF co-cultures** | | |  |  |  |
| --- | --- | --- | --- | --- | --- |
|  |  |  |  |  |  |
|  |  |  |  |  |  |
|  |  |  |  |  |  |
| **Gene ID** | **Gene Symbol** | **Description** | **Log2(fold change) CAF/Ctrl** | **p-value** | **FDR** |
|
|
| 100302652 | GPR75-ASB3 | GPR75-ASB3 readthrough(GPR75-ASB3) | 9.18 | 4.6E-04 | 7.1E-03 |
| 1041 | CDSN | corneodesmosin(CDSN) | 7.49 | 3.4E-04 | 5.7E-03 |
| 8745 | ADAM23 | ADAM metallopeptidase domain 23(ADAM23) | 7.01 | 4.6E-04 | 7.1E-03 |
| 145741 | C2CD4A | C2 calcium dependent domain containing 4A(C2CD4A) | 4.83 | 8.5E-05 | 2.2E-03 |
| 10563 | CXCL13 | C-X-C motif chemokine ligand 13(CXCL13) | 4.71 | 1.4E-04 | 3.1E-03 |
| 5950 | RBP4 | retinol binding protein 4(RBP4) | 3.76 | 3.9E-04 | 6.4E-03 |
| 64084 | CLSTN2 | calsyntenin 2(CLSTN2) | 3.43 | 4.5E-04 | 7.0E-03 |
| 348938 | NIPAL4 | NIPA like domain containing 4(NIPAL4) | 3.41 | 5.2E-04 | 7.7E-03 |
| 26585 | GREM1 | gremlin 1, DAN family BMP antagonist(GREM1) | 3.36 | 3.3E-03 | 2.7E-02 |
| 283860 | LINC00304 | L1 cell adhesion molecule(L1CAM) | 3.35 | 7.5E-03 | 4.6E-02 |
| 59284 | CACNG7 | calcium voltage-gated channel auxiliary subunit gamma 7(CACNG7) | 3.34 | 6.5E-04 | 8.8E-03 |
| 400541 | LOC400541 | uncharacterized LOC400541(LOC400541) | 3.30 | 3.3E-03 | 2.7E-02 |
| 165904 | XIRP1 | xin actin binding repeat containing 1(XIRP1) | 3.25 | 5.7E-05 | 1.7E-03 |
| 116931 | MED12L | mediator complex subunit 12 like(MED12L) | 3.23 | 2.2E-04 | 4.2E-03 |
| 56000 | NXF3 | nuclear RNA export factor 3(NXF3) | 3.21 | 8.4E-04 | 1.0E-02 |
| 116159 | CYYR1 | cysteine and tyrosine rich 1(CYYR1) | 3.06 | 4.5E-05 | 1.5E-03 |
| 9481 | SLC25A27 | solute carrier family 25 member 27(SLC25A27) | 2.99 | 6.3E-03 | 4.1E-02 |
| 2044 | EPHA5 | EPH receptor A5(EPHA5) | 2.94 | 8.7E-05 | 2.3E-03 |
| 79983 | POF1B | premature ovarian failure, 1B(POF1B) | 2.93 | 6.6E-03 | 4.2E-02 |
| 64881 | PCDH20 | protocadherin 20(PCDH20) | 2.93 | 1.8E-06 | 2.1E-04 |
| 79931 | TNIP3 | TNFAIP3 interacting protein 3(TNIP3) | 2.69 | 1.3E-03 | 1.4E-02 |
| 2895 | GRID2 | glutamate ionotropic receptor delta type subunit 2(GRID2) | 2.61 | 1.5E-03 | 1.6E-02 |
| 4803 | NGF | nerve growth factor(NGF) | 2.60 | 5.3E-03 | 3.7E-02 |
| 55966 | AJAP1 | adherens junctions associated protein 1(AJAP1) | 2.59 | 4.8E-09 | 1.5E-05 |
| 100131378 | C11orf91 | chromosome 11 open reading frame 91(C11orf91) | 2.56 | 7.2E-04 | 9.4E-03 |
| 643733 | LOC643733 | caspase 4, apoptosis-related cysteine peptidase pseudogene(LOC643733) | 2.52 | 1.3E-03 | 1.4E-02 |
| 1301 | COL11A1 | collagen type XI alpha 1 chain(COL11A1) | 2.52 | 1.4E-03 | 1.5E-02 |
| 4773 | NFATC2 | nuclear factor of activated T-cells 2(NFATC2) | 2.48 | 2.9E-06 | 2.8E-04 |
| 6376 | CX3CL1 | C-X3-C motif chemokine ligand 1(CX3CL1) | 2.48 | 2.8E-04 | 5.0E-03 |
| 10324 | KLHL41 | lysine demethylase 7A(KDM7A) | 2.47 | 2.0E-07 | 5.9E-05 |
| 4023 | LPL | lipoprotein lipase(LPL) | 2.45 | 3.1E-03 | 2.6E-02 |
| 1278 | COL1A2 | collagen type I alpha 2 chain(COL1A2) | 2.42 | 5.8E-05 | 1.7E-03 |
| 90853 | SPOCD1 | SPOC domain containing 1(SPOCD1) | 2.42 | 2.1E-07 | 5.9E-05 |
| 710 | SERPING1 | serpin family G member 1(SERPING1) | 2.40 | 4.6E-04 | 7.1E-03 |
| 4148 | MATN3 | matrilin 3(MATN3) | 2.40 | 4.1E-03 | 3.1E-02 |
| 374897 | SBSN | suprabasin(SBSN) | 2.37 | 4.1E-03 | 3.1E-02 |
| 60468 | BACH2 | BTB domain and CNC homolog 2(BACH2) | 2.37 | 4.6E-05 | 1.5E-03 |
| 3274 | HRH2 | histamine receptor H1(HRH1) | 2.33 | 8.5E-04 | 1.1E-02 |
| 50944 | SHANK1 | SH3 and multiple ankyrin repeat domains 1(SHANK1) | 2.32 | 4.3E-06 | 3.5E-04 |
| 64093 | SMOC1 | SPARC related modular calcium binding 1(SMOC1) | 2.31 | 1.4E-06 | 1.9E-04 |
| 9936 | CD302 | CD302 molecule(CD302) | 2.25 | 5.8E-03 | 3.9E-02 |
| 3604 | TNFRSF9 | TNF receptor superfamily member 9(TNFRSF9) | 2.24 | 1.3E-05 | 7.0E-04 |
| 8676 | STX11 | syntaxin 11(STX11) | 2.18 | 3.1E-07 | 7.3E-05 |
| 63827 | BCAN | brevican(BCAN) | 2.16 | 2.4E-06 | 2.5E-04 |
| 349136 | WDR86 | WD repeat domain 86(WDR86) | 2.09 | 4.8E-03 | 3.4E-02 |
| 5999 | RGS4 | regulator of G-protein signaling 4(RGS4) | 2.09 | 2.3E-05 | 9.4E-04 |
| 83481 | EPPK1 | epiplakin 1(EPPK1) | 2.08 | 8.5E-08 | 4.7E-05 |
| 3371 | TNC | tenascin C(TNC) | 2.04 | 7.5E-09 | 1.7E-05 |
| 199800 | ADM5 | adrenomedullin 5 (putative)(ADM5) | 2.00 | 1.5E-04 | 3.2E-03 |
| 924 | CD7 | CD7 molecule(CD7) | 1.99 | 9.1E-07 | 1.4E-04 |
| 414236 | C10orf55 | chromosome 10 open reading frame 55(C10orf55) | 1.96 | 7.3E-03 | 4.5E-02 |
| 83716 | CRISPLD2 | cysteine rich secretory protein LCCL domain containing 2(CRISPLD2) | 1.96 | 4.1E-03 | 3.1E-02 |
| 868 | CBLB | Cbl proto-oncogene B(CBLB) | 1.94 | 1.4E-07 | 5.5E-05 |
| 7042 | TGFB2 | transforming growth factor beta 2(TGFB2) | 1.94 | 1.7E-08 | 2.1E-05 |
| 26279 | PLA2G2D | phospholipase A2 group IID(PLA2G2D) | 1.92 | 3.5E-05 | 1.2E-03 |
| 23034 | SAMD4A | sterile alpha motif domain containing 4A(SAMD4A) | 1.92 | 8.3E-09 | 1.7E-05 |
| 6781 | STC1 | stanniocalcin 1(STC1) | 1.91 | 7.1E-07 | 1.2E-04 |
| 27330 | RPS6KA6 | ribosomal protein S6 kinase A6(RPS6KA6) | 1.91 | 1.4E-03 | 1.5E-02 |
| 3096 | HIVEP1 | HIC ZBTB transcriptional repressor 1(HIC1) | 1.89 | 4.0E-04 | 6.4E-03 |
| 84665 | MYPN | myopalladin(MYPN) | 1.88 | 2.0E-08 | 2.1E-05 |
| 3656 | IRAK2 | inhibitor of DNA binding 2, HLH protein(ID2) | 1.88 | 2.6E-05 | 1.0E-03 |
| 80853 | KDM7A | potassium voltage-gated channel subfamily E regulatory subunit 3(KCNE3) | 1.87 | 2.3E-08 | 2.2E-05 |
| 100129518 | LOC100129518 | uncharacterized LOC100129518(LOC100129518) | 1.87 | 1.8E-06 | 2.1E-04 |
| 81629 | TSSK3 | testis specific serine kinase 3(TSSK3) | 1.85 | 4.8E-05 | 1.5E-03 |
| 84953 | MICALCL | MICAL C-terminal like(MICALCL) | 1.84 | 1.0E-04 | 2.6E-03 |
| 5205 | ATP8B1 | ATPase phospholipid transporting 8B1(ATP8B1) | 1.82 | 2.1E-08 | 2.1E-05 |
| 4613 | MYCN | v-myc avian myelocytomatosis viral oncogene neuroblastoma derived homolog(MYCN) | 1.80 | 2.7E-03 | 2.4E-02 |
| 147111 | NOTUM | NOTUM, palmitoleoyl-protein carboxylesterase(NOTUM) | 1.78 | 9.4E-04 | 1.1E-02 |
| 205860 | TRIML2 | tripartite motif family like 2(TRIML2) | 1.76 | 2.2E-03 | 2.1E-02 |
| 115265 | DDIT4L | DNA damage inducible transcript 4 like(DDIT4L) | 1.76 | 2.9E-04 | 5.2E-03 |
| 53942 | CNTN5 | contactin 5(CNTN5) | 1.76 | 4.1E-05 | 1.4E-03 |
| 65249 | ZSWIM4 | zinc finger SWIM-type containing 4(ZSWIM4) | 1.74 | 5.0E-06 | 3.8E-04 |
| 3269 | HRH1 | homeobox A6(HOXA6) | 1.74 | 1.7E-07 | 5.6E-05 |
| 163732 | CITED4 | Cbp/p300 interacting transactivator with Glu/Asp rich carboxy-terminal domain 4(CITED4) | 1.74 | 3.6E-04 | 6.0E-03 |
| 10216 | PRG4 | proteoglycan 4(PRG4) | 1.72 | 6.2E-04 | 8.5E-03 |
| 2700 | GJA3 | gap junction protein alpha 3(GJA3) | 1.72 | 3.5E-06 | 3.0E-04 |
| 3097 | HIVEP2 | human immunodeficiency virus type I enhancer binding protein 1(HIVEP1) | 1.69 | 2.2E-05 | 9.3E-04 |
| 64131 | XYLT1 | xylosyltransferase 1(XYLT1) | 1.67 | 3.2E-05 | 1.2E-03 |
| 10611 | PDLIM5 | PDZ and LIM domain 5(PDLIM5) | 1.66 | 1.6E-08 | 2.1E-05 |
| 23562 | CLDN14 | claudin 14(CLDN14) | 1.66 | 2.9E-03 | 2.5E-02 |
| 79689 | STEAP4 | STEAP4 metalloreductase(STEAP4) | 1.66 | 4.8E-05 | 1.5E-03 |
| 2250 | FGF5 | fibroblast growth factor 5(FGF5) | 1.66 | 7.4E-03 | 4.5E-02 |
| 253559 | CADM2 | cell adhesion molecule 2(CADM2) | 1.65 | 6.1E-03 | 4.0E-02 |
| 27115 | PDE7B | phosphodiesterase 7B(PDE7B) | 1.65 | 5.0E-03 | 3.5E-02 |
| 1803 | DPP4 | dipeptidyl peptidase 4(DPP4) | 1.65 | 4.2E-03 | 3.1E-02 |
| 7477 | WNT7B | Wnt family member 7B(WNT7B) | 1.64 | 2.3E-06 | 2.4E-04 |
| 6865 | TACR2 | tachykinin receptor 2(TACR2) | 1.63 | 4.1E-03 | 3.1E-02 |
| 59269 | HIVEP3 | human immunodeficiency virus type I enhancer binding protein 2(HIVEP2) | 1.63 | 1.4E-08 | 2.1E-05 |
| 90874 | ZNF697 | zinc finger protein 697(ZNF697) | 1.63 | 1.9E-07 | 5.9E-05 |
| 57688 | ZSWIM6 | zinc finger SWIM-type containing 6(ZSWIM6) | 1.63 | 3.3E-04 | 5.6E-03 |
| 27128 | CYTH4 | cytohesin 4(CYTH4) | 1.62 | 2.0E-03 | 1.9E-02 |
| 90102 | PHLDB2 | pleckstrin homology like domain family B member 2(PHLDB2) | 1.62 | 1.6E-04 | 3.3E-03 |
| 8877 | SPHK1 | sphingosine kinase 1(SPHK1) | 1.61 | 1.7E-05 | 7.9E-04 |
| 9536 | PTGES | prostaglandin E synthase(PTGES) | 1.61 | 7.7E-04 | 9.8E-03 |
| 81553 | FAM49A | family with sequence similarity 49 member A(FAM49A) | 1.61 | 4.1E-04 | 6.6E-03 |
| 50509 | COL5A3 | collagen type V alpha 3 chain(COL5A3) | 1.59 | 2.7E-06 | 2.7E-04 |
| 23327 | NEDD4L | neural precursor cell expressed, developmentally down-regulated 4-like, E3 ubiquitin protein ligase(NEDD4L) | 1.59 | 2.0E-06 | 2.3E-04 |
| 79660 | PPP1R3B | protein phosphatase 1 regulatory subunit 3B(PPP1R3B) | 1.58 | 1.7E-07 | 5.6E-05 |
| 85462 | FHDC1 | FH2 domain containing 1(FHDC1) | 1.58 | 1.8E-03 | 1.8E-02 |
| 1601 | DAB2 | DAB2, clathrin adaptor protein(DAB2) | 1.57 | 2.6E-08 | 2.3E-05 |
| 2706 | GJB2 | gap junction protein beta 2(GJB2) | 1.57 | 1.8E-04 | 3.7E-03 |
| 3383 | ICAM1 | heat shock protein family A (Hsp70) member 6(HSPA6) | 1.56 | 9.3E-07 | 1.4E-04 |
| 25834 | MGAT4C | MGAT4 family member C(MGAT4C) | 1.56 | 1.3E-03 | 1.4E-02 |
| 10371 | SEMA3A | semaphorin 3A(SEMA3A) | 1.56 | 1.0E-04 | 2.5E-03 |
| 8786 | RGS11 | regulator of G-protein signaling 11(RGS11) | 1.56 | 7.1E-03 | 4.4E-02 |
| 1440 | CSF3 | colony stimulating factor 3(CSF3) | 1.56 | 2.2E-03 | 2.1E-02 |
| 80271 | ITPKC | integrin subunit beta 3(ITGB3) | 1.56 | 1.8E-08 | 2.1E-05 |
| 3090 | HIC1 | hes related family bHLH transcription factor with YRPW motif 1(HEY1) | 1.55 | 1.4E-06 | 1.8E-04 |
| 7373 | COL14A1 | collagen type XIV alpha 1 chain(COL14A1) | 1.55 | 1.4E-07 | 5.5E-05 |
| 3897 | L1CAM | kelch like family member 41(KLHL41) | 1.55 | 5.7E-07 | 1.1E-04 |
| 440730 | TRIM67 | tripartite motif containing 67(TRIM67) | 1.55 | 5.4E-03 | 3.7E-02 |
| 25802 | LMOD1 | leiomodin 1(LMOD1) | 1.54 | 8.9E-05 | 2.3E-03 |
| 693199 | MIR614 | microRNA 614(MIR614) | 1.52 | 1.1E-06 | 1.6E-04 |
| 57030 | SLC17A7 | solute carrier family 17 member 7(SLC17A7) | 1.52 | 5.4E-04 | 7.8E-03 |
| 3690 | ITGB3 | interleukin 1 receptor associated kinase 2(IRAK2) | 1.51 | 1.2E-05 | 6.8E-04 |
| 5971 | RELB | RELB proto-oncogene, NF-kB subunit(RELB) | 1.51 | 2.8E-04 | 5.1E-03 |
| 284076 | TTLL6 | tubulin tyrosine ligase like 6(TTLL6) | 1.51 | 4.8E-03 | 3.4E-02 |
| 611 | OPN1SW | opsin 1 (cone pigments), short-wave-sensitive(OPN1SW) | 1.50 | 5.4E-03 | 3.7E-02 |
| 132430 | PABPC4L | poly(A) binding protein cytoplasmic 4 like(PABPC4L) | -1.50 | 4.7E-03 | 3.3E-02 |
| 5997 | RGS2 | regulator of G-protein signaling 2(RGS2) | -1.51 | 3.1E-07 | 7.3E-05 |
| 257236 | CCDC96 | coiled-coil domain containing 96(CCDC96) | -1.53 | 5.0E-03 | 3.5E-02 |
| 407013 | MIR24-2 | microRNA 24-2(MIR24-2) | -1.53 | 3.0E-07 | 7.3E-05 |
| 221833 | SP8 | Sp8 transcription factor(SP8) | -1.54 | 4.2E-03 | 3.2E-02 |
| 218 | ALDH3A1 | aldehyde dehydrogenase 3 family member A1(ALDH3A1) | -1.54 | 2.5E-07 | 6.7E-05 |
| 23462 | HEY1 | hypophosphatemic bone disease(HBD) | -1.55 | 1.1E-05 | 6.4E-04 |
| 57561 | ARRDC3 | arrestin domain containing 3(ARRDC3) | -1.56 | 1.4E-04 | 3.2E-03 |
| 10008 | KCNE3 | inositol-trisphosphate 3-kinase C(ITPKC) | -1.59 | 4.8E-03 | 3.4E-02 |
| 4634 | MYL3 | myosin light chain 3(MYL3) | -1.60 | 1.0E-04 | 2.6E-03 |
| 116039 | OSR2 | odd-skipped related transciption factor 2(OSR2) | -1.60 | 7.9E-04 | 1.0E-02 |
| 220359 | TIGD3 | tigger transposable element derived 3(TIGD3) | -1.60 | 6.0E-03 | 4.0E-02 |
| 284071 | MEIOC | meiosis specific with coiled-coil domain(MEIOC) | -1.61 | 6.3E-03 | 4.1E-02 |
| 2220 | FCN2 | ficolin 2(FCN2) | -1.61 | 1.8E-03 | 1.8E-02 |
| 105372273 | LOC105372273 | uncharacterized LOC105372273(LOC105372273) | -1.62 | 7.4E-03 | 4.5E-02 |
| 3198 | HOXA1 | human immunodeficiency virus type I enhancer binding protein 3(HIVEP3) | -1.63 | 1.8E-03 | 1.8E-02 |
| 2653 | GCSH | glycine cleavage system protein H(GCSH) | -1.64 | 2.1E-03 | 2.0E-02 |
| 6799 | SULT1A2 | sulfotransferase family 1A member 2(SULT1A2) | -1.65 | 5.6E-03 | 3.8E-02 |
| 3203 | HOXA6 | homeobox A1(HOXA1) | -1.66 | 1.3E-03 | 1.4E-02 |
| 245711 | SPDYA | speedy/RINGO cell cycle regulator family member A(SPDYA) | -1.66 | 3.0E-03 | 2.5E-02 |
| 23220 | DTX4 | deltex E3 ubiquitin ligase 4(DTX4) | -1.67 | 5.1E-05 | 1.6E-03 |
| 4607 | MYBPC3 | myosin binding protein C, cardiac(MYBPC3) | -1.68 | 2.0E-04 | 4.0E-03 |
| 4625 | MYH7 | myosin heavy chain 7(MYH7) | -1.69 | 5.7E-05 | 1.7E-03 |
| 7832 | BTG2 | BTG anti-proliferation factor 2(BTG2) | -1.70 | 1.2E-05 | 6.7E-04 |
| 144817 | LINC00330 | long intergenic non-protein coding RNA 304(LINC00304) | -1.70 | 8.6E-04 | 1.1E-02 |
| 1050 | CEBPA | CCAAT/enhancer binding protein alpha(CEBPA) | -1.75 | 5.0E-03 | 3.5E-02 |
| 26 | AOC1 | amine oxidase, copper containing 1(AOC1) | -1.75 | 9.9E-04 | 1.2E-02 |
| 3045 | HBD | hemoglobin subunit delta(HBD) | -1.75 | 5.0E-03 | 3.5E-02 |
| 467 | ATF3 | activating transcription factor 3(ATF3) | -1.77 | 1.3E-04 | 2.9E-03 |
| 88 | ACTN2 | actinin alpha 2(ACTN2) | -1.78 | 5.9E-04 | 8.3E-03 |
| 1128 | CHRM1 | cholinergic receptor muscarinic 1(CHRM1) | -1.79 | 3.0E-03 | 2.6E-02 |
| 4110 | MAGEA11 | MAGE family member A11(MAGEA11) | -1.79 | 3.7E-03 | 2.9E-02 |
| 100129792 | CCDC152 | coiled-coil domain containing 152(CCDC152) | -1.81 | 4.6E-04 | 7.1E-03 |
| 23316 | CUX2 | cut like homeobox 2(CUX2) | -1.81 | 1.0E-03 | 1.2E-02 |
| 7139 | TNNT2 | troponin T2, cardiac type(TNNT2) | -1.84 | 5.6E-05 | 1.7E-03 |
| 3397 | ID1 | intercellular adhesion molecule 1(ICAM1) | -1.85 | 1.5E-07 | 5.6E-05 |
| 387640 | SKIDA1 | SKI/DACH domain containing 1(SKIDA1) | -1.87 | 8.6E-05 | 2.2E-03 |
| 641364 | SLC7A11-AS1 | SLC7A11 antisense RNA 1(SLC7A11-AS1) | -1.88 | 4.2E-03 | 3.2E-02 |
| 70 | ACTC1 | actin, alpha, cardiac muscle 1(ACTC1) | -1.88 | 3.9E-06 | 3.3E-04 |
| 79365 | BHLHE41 | basic helix-loop-helix family member e41(BHLHE41) | -1.89 | 1.1E-08 | 2.0E-05 |
| 4633 | MYL2 | myosin light chain 2(MYL2) | -1.94 | 6.5E-05 | 1.8E-03 |
| 2852 | GPER1 | G protein-coupled estrogen receptor 1(GPER1) | -1.95 | 3.4E-03 | 2.7E-02 |
| 26050 | SLITRK5 | SLIT and NTRK like family member 5(SLITRK5) | -1.95 | 3.7E-05 | 1.3E-03 |
| 84206 | MEX3B | mex-3 RNA binding family member B(MEX3B) | -1.96 | 4.2E-07 | 8.9E-05 |
| 100129716 | ARRDC3-AS1 | ARRDC3 antisense RNA 1(ARRDC3-AS1) | -2.01 | 2.7E-04 | 4.8E-03 |
| 4624 | MYH6 | myosin heavy chain 6(MYH6) | -2.06 | 9.5E-07 | 1.4E-04 |
| 23237 | ARC | activity regulated cytoskeleton associated protein(ARC) | -2.17 | 2.9E-05 | 1.1E-03 |
| 79170 | PRR15L | proline rich 15 like(PRR15L) | -2.17 | 3.5E-03 | 2.8E-02 |
| 286530 | P2RY8 | purinergic receptor P2Y8(P2RY8) | -2.30 | 1.3E-04 | 3.0E-03 |
| 4804 | NGFR | nerve growth factor receptor(NGFR) | -2.31 | 1.3E-07 | 5.5E-05 |
| 8912 | CACNA1H | calcium voltage-gated channel subunit alpha1 H(CACNA1H) | -2.32 | 1.4E-04 | 3.1E-03 |
| 285629 | LINC02159 | long intergenic non-protein coding RNA 330(LINC00330) | -2.33 | 6.8E-04 | 9.0E-03 |
| 6279 | S100A8 | S100 calcium binding protein A8(S100A8) | -2.61 | 3.3E-06 | 2.9E-04 |
| 10912 | GADD45G | growth arrest and DNA damage inducible gamma(GADD45G) | -2.98 | 6.7E-10 | 8.3E-06 |
| 3398 | ID2 | inhibitor of DNA binding 1, HLH protein(ID1) | -3.01 | 2.4E-09 | 1.1E-05 |
| 6280 | S100A9 | S100 calcium binding protein A9(S100A9) | -3.11 | 4.0E-05 | 1.4E-03 |
| 3310 | HSPA6 | histamine receptor H2(HRH2) | -4.90 | 1.2E-09 | 8.3E-06 |

| **Table S6. Extended list of top 30 enriched pathways in Ctrl vs NF co-culture** | | |  |
| --- | --- | --- | --- |
|  |  |  |  |
| **ID** | **Term** | **Adj.P** | **Genes** |
| path:hsa05410 | Hypertrophic cardiomyopathy (HCM) | 1.2E-07 | MYH7,TGFB2,MYL2,TNNT2,MYBPC3,ACTC1,MYL3,MYH6 |
| path:hsa05414 | Dilated cardiomyopathy (DCM) | 2.2E-07 | MYH7,TGFB2,MYL2,TNNT2,MYBPC3,ACTC1,MYL3,MYH6 |
| path:hsa04260 | Cardiac muscle contraction | 1.9E-05 | MYH7,MYL2,TNNT2,ACTC1,MYL3,MYH6 |
| path:hsa05144 | Malaria | 2.5E-05 | ICAM1,TGFB2,CSF3,TLR2,VCAM1 |
| path:hsa04261 | Adrenergic signaling in cardiomyocytes | 7.4E-05 | CAMK2B,MYH7,MYL2,TNNT2,ACTC1,MYL3,MYH6 |
| path:hsa04060 | Cytokine-cytokine receptor interaction | 6.7E-04 | CX3CL1,TNFRSF9,NGFR,TGFB2,CSF3,CXCL13,CXCL1,TNFRSF10D |
| path:hsa04668 | TNF signaling pathway | 1.1E-03 | CX3CL1,TRAF1,ICAM1,VCAM1,CXCL1 |
| path:hsa05323 | Rheumatoid arthritis | 4.0E-03 | ICAM1,TGFB2,TLR2,CXCL1 |
| path:hsa04064 | NF-kappa B signaling pathway | 4.9E-03 | TRAF1,ICAM1,RELB,VCAM1 |
| path:hsa05146 | Amoebiasis | 5.1E-03 | TGFB2,TLR2,CXCL1,COL1A2 |
| path:hsa04933 | AGE-RAGE signaling pathway in diabetic complications | 5.7E-03 | ICAM1,TGFB2,VCAM1,COL1A2 |
| path:hsa05134 | Legionellosis | 7.3E-03 | TLR2,CXCL1,HSPA6 |
| path:hsa05416 | Viral myocarditis | 8.9E-03 | ICAM1,MYH7,MYH6 |
| path:hsa04380 | Osteoclast differentiation | 1.4E-02 | TGFB2,TREM2,NFATC2,RELB |
| path:hsa05162 | Measles | 1.6E-02 | CBLB,TLR2,HSPA6,TNFRSF10D |
| path:hsa04371 | Apelin signaling pathway | 1.7E-02 | BORCS8-MEF2B,MYL2,KLF2,MYL3 |
| path:hsa05220 | Chronic myeloid leukemia | 1.9E-02 | TGFB2,CBLB,GADD45G |
| path:hsa04710 | Circadian rhythm | 2.1E-02 | BHLHE41,NR1D1 |
| path:hsa04350 | TGF-beta signaling pathway | 2.3E-02 | TGFB2,ID2,MINOS1-NBL1 |
| path:hsa05143 | African trypanosomiasis | 2.7E-02 | ICAM1,VCAM1 |
| path:hsa04010 | MAPK signaling pathway | 3.7E-02 | TGFB2,RELB,GADD45G,HSPA6,CACNA1H |
| path:hsa05166 | HTLV-I infection | 3.7E-02 | ICAM1,TGFB2,NFATC2,RELB,VCAM1 |
| path:hsa05152 | Tuberculosis | 4.1E-02 | CAMK2B,TGFB2,IRAK2,TLR2 |
| path:hsa04020 | Calcium signaling pathway | 4.3E-02 | CAMK2B,ITPKC,CACNA1H,HRH1 |
| path:hsa05202 | Transcriptional misregulation in cancer | 4.6E-02 | TRAF1,NGFR,ID2,GADD45G |
| path:hsa04670 | Leukocyte transendothelial migration | 4.8E-02 | ICAM1,MYL2,VCAM1 |
| path:hsa05145 | Toxoplasmosis | 4.9E-02 | TGFB2,TLR2,HSPA6 |
| path:hsa05169 | Epstein-Barr virus infection | 6.0E-02 | TRAF1,ICAM1,RELB,HSPA6 |
| path:hsa05205 | Proteoglycans in cancer | 6.0E-02 | CAMK2B,TGFB2,CBLB,TLR2 |
| path:hsa04650 | Natural killer cell mediated cytotoxicity | 7.2E-02 | ICAM1,NFATC2,TNFRSF10D |

| **Table S7. Extended list of top 30 enriched pathways in Ctrl vs CAF co-culture** | | |  |
| --- | --- | --- | --- |
|  |  |  |  |
| **ID** | **Term** | **Adj.P** | **Genes** |
| path:hsa05200 | Pathways in cancer | 1.2E-11 | ITGA3,RALA,HGF,BIRC3,FAS,LAMA3,TRAF1,LAMC2,ROCK1,RASSF1,PLD1,MLH1,NFKB2,FGFR1,COL4A4,GSK3B,MECOM,MMP2,BIRC5,LAMB1,TGFB2,ABL1,CRKL,HIF1A,AXIN1,TGFB1,PIK3R2,CDK6,MET,CCDC6,NFKB1,ZBTB16,BIRC2,CBL,CDKN1B,PPARD,E2F3,WNT5A,CBLB,APC2,EPAS1,PIK3R3,PGF,TGFB3,GNA13,PIK3CA,CKS2,PLCG1,CDKN1A,BMP4,BMP2,STAT5A,F2RL3,EGLN3,TRAF3,RARA,PPARG,COL4A2,ETS1,CDK4,EGLN1,LAMC1,MYC,ITGAV,FGF5,IGF1R,PML,SMAD4,SKP2,ITGB1,VEGFC,FOXO1,PRKCA,FZD1,BRAF,JAK1,SMAD3,NKX3-1,CRK,STAT3,AR,CXCL8,LPAR3,PTGER4,BCL2L1,PIK3CD,RELA,JUP,GNG5,FZD4,TRAF6,JUN,FZD2,PTCH1,BCR,COL4A1,WNT7B,ARHGEF12,PDGFA,LPAR1,RXRB,CEBPA,RASSF5 |
| path:hsa04510 | Focal adhesion | 3.0E-11 | ITGA3,HGF,BIRC3,VCL,TNC,BCAR1,LAMA3,LAMC2,PPP1R12A,MYLK,ROCK1,ACTN1,COL4A4,GSK3B,LAMB1,CRKL,MYL9,MYL12A,PIK3R2,CAV2,CAV1,MET,RAPGEF1,COL1A1,BIRC2,MYL2,PIK3R3,CCND2,PGF,PIK3CA,KDR,SHC2,ACTN4,ITGB4,VAV3,COL4A2,ITGA7,LAMC1,FLNB,THBS1,ITGAV,IGF1R,COL6A1,COL6A2,ITGB1,VEGFC,PRKCA,BRAF,ZYX,ITGA5,COL6A3,COL1A2,CRK,PDGFD,PIK3CD,JUN,ACTG1,PIP5K1C,COL4A1,FLNA,SRC,PDGFA,ITGB3 |
| path:hsa05220 | Chronic myeloid leukemia | 3.8E-08 | MECOM,TGFB2,ABL1,GADD45B,CRKL,TGFB1,PIK3R2,CDK6,NFKB1,CBL,CDKN1B,E2F3,CBLB,PIK3R3,TGFB3,PIK3CA,CDKN1A,STAT5A,SHC2,GADD45G,CDK4,MYC,SMAD4,BRAF,SMAD3,CRK,BCL2L1,PIK3CD,RELA,BCR |
| path:hsa05222 | Small cell lung cancer | 8.0E-08 | ITGA3,BIRC3,LAMA3,TRAF1,LAMC2,COL4A4,LAMB1,GADD45B,PIK3R2,CDK6,NFKB1,BIRC2,CDKN1B,E2F3,PIK3R3,PIK3CA,CKS2,CDKN1A,GADD45G,TRAF3,COL4A2,CDK4,LAMC1,MYC,ITGAV,SKP2,ITGB1,BCL2L1,PIK3CD,RELA,TRAF6,COL4A1,RXRB |
| path:hsa05205 | Proteoglycans in cancer | 2.4E-07 | PLAUR,HGF,FAS,CD44,ANK1,PPP1R12A,ROCK1,FGFR1,MMP2,TGFB2,ITPR3,TIMP3,HIF1A,TGFB1,PIK3R2,CAV2,CAV1,MET,CBL,WNT5A,CBLB,PIK3R3,PIK3CA,PLAU,SDC4,PLCG1,CDKN1A,KDR,CTSL,FLNB,MYC,TLR2,THBS1,ITGAV,IGF1R,IQGAP1,ANK2,ITGB1,PRKCA,TIAM1,FZD1,BRAF,ITGA5,FRS2,STAT3,PIK3CD,FZD4,FZD2,ACTG1,PTCH1,WNT7B,ARHGEF12,FLNA,SRC,ITGB3 |
| path:hsa05410 | Hypertrophic cardiomyopathy (HCM) | 7.1E-07 | ITGA3,MYH7,TGFB2,TGFB1,CACNG7,PRKAG2,MYL2,TNNC1,TNNT2,TGFB3,TNNI3,ITGB4,MYBPC3,ITGA7,ITGAV,TPM1,ITGB1,TTN,CACNA2D3,ACTC1,MYL3,ITGA5,TPM4,ATP2A2,ACTG1,MYH6,TPM2,DMD,ITGB3 |
| path:hsa04668 | TNF signaling pathway | 1.3E-06 | CFLAR,CX3CL1,BIRC3,FAS,MAP2K3,TRAF1,MAP2K7,EDN1,ITCH,CXCL2,ICAM1,JAG1,PIK3R2,MAP3K8,NFKB1,BIRC2,IL18R1,PIK3R3,PIK3CA,TRAF3,DAB2IP,CREB5,VEGFC,MMP14,CXCL3,CXCL1,PIK3CD,CEBPB,RELA,JUN,CREB3L2,SOCS3,MAP3K5,CCL5 |
| path:hsa04933 | AGE-RAGE signaling pathway in diabetic complications | 1.4E-06 | EDN1,COL4A4,MMP2,ICAM1,TGFB2,TGFB1,PIK3R2,COL1A1,NFKB1,CDKN1B,PIK3R3,TGFB3,PIK3CA,PLCG1,STAT5A,COL4A2,CDK4,PIM1,SMAD4,VEGFC,FOXO1,PRKCA,PLCD3,COL1A2,SMAD3,STAT3,CXCL8,PIK3CD,RELA,JUN,THBD,COL4A1 |
| path:hsa04520 | Adherens junction | 4.7E-06 | SNAI2,VCL,ACTN1,FGFR1,SORBS1,TJP1,MET,WASL,NECTIN2,AFDN,ACTN4,IGF1R,IQGAP1,SMAD4,PTPRF,PTPRJ,WASF2,SMAD3,INSR,PTPRM,BAIAP2,YES1,ACTG1,PTPN1,SRC |
| path:hsa04390 | Hippo signaling pathway | 5.3E-06 | TEAD3,WWTR1,SNAI2,RASSF1,TP73,GSK3B,BIRC5,TGFB2,SMAD7,AXIN1,TGFB1,AREG,BIRC2,WWC1,WNT5A,APC2,ID2,CCND2,TGFB3,BMP4,BMP2,GDF5,ID1,YWHAH,AJUBA,MYC,YAP1,FRMD6,CSNK1D,SMAD4,TP53BP2,LATS2,DLG2,FZD1,ITGB2,SMAD3,FZD4,FZD2,ACTG1,TEAD1,WNT7B,LOC400927-CSNK1E |
| path:hsa04110 | Cell cycle | 5.4E-06 | MCM6,GSK3B,TGFB2,CDC6,ABL1,GADD45B,CDC25B,TGFB1,CDK6,CDKN1B,E2F3,TTK,CCND2,TGFB3,CDKN2C,CDKN1A,YWHAH,GADD45G,CCNB1,CDK4,ESPL1,MYC,SMAD4,CCNA2,SKP2,CCNB3,BUB1B,CCNB2,CDC25A,MAD2L1,PTTG1,WEE1,PLK1,SMAD3,CDK1,SFN |
| path:hsa04218 | Cellular senescence | 6.2E-06 | MAP2K3,TGFB2,ITPR3,SIRT1,GADD45B,NFATC2,TGFB1,PIK3R2,CDK6,NFKB1,HIPK3,FOXM1,E2F3,PIK3R3,CCND2,TGFB3,PPP3CC,PIK3CA,CDKN1A,GADD45G,CCNB1,ETS1,CDK4,MYC,PPP3CA,CCNA2,CCNB3,FOXO1,CCNB2,CALM3,MAPKAPK2,HIPK1,CDC25A,TSC1,SMAD3,CXCL8,CDK1,PIK3CD,RELA,LIN9,ZFP36L1,HLA-E,RASSF5 |
| path:hsa05146 | Amoebiasis | 6.5E-06 | VCL,LAMA3,LAMC2,GNA15,ACTN1,COL4A4,LAMB1,TGFB2,TGFB1,PIK3R2,COL1A1,NFKB1,IL1R2,IL1R1,PIK3R3,TGFB3,PIK3CA,ACTN4,COL4A2,LAMC1,TLR2,RAB5A,PRKCA,ITGB2,CXCL1,COL1A2,CXCL8,PIK3CD,RELA,COL4A1 |
| path:hsa04151 | PI3K-Akt signaling pathway | 1.3E-05 | ITGA3,BRCA1,HGF,TNC,LAMA3,LAMC2,NGFR,PKN2,PPP2R3A,IL4R,FGFR1,COL4A4,PHLPP1,GSK3B,LAMB1,ANGPT4,PIK3R2,CDK6,MET,CSF3,COL1A1,NFKB1,CDKN1B,PIK3R3,SGK1,CCND2,PGF,PIK3CA,NR4A1,CDKN1A,KDR,YWHAH,ITGB4,NGF,COL4A2,ITGA7,CDK4,LAMC1,MYC,TLR2,THBS1,ITGAV,FGF5,IGF1R,COL6A1,COL6A2,OSMR,CREB5,ITGB1,VEGFC,PRKCA,IL6R,CRTC2,ITGA5,JAK1,COL6A3,COL1A2,TSC1,MLST8,DDIT4,CHRM1,IL7R,EFNA1,PDGFD,INSR,LPAR3,BCL2L1,PIK3CD,RELA,GNG5,CREB3L2,COL4A1,PDGFA,LPAR1,ITGB3 |
| path:hsa05202 | Transcriptional misregulation in cancer | 1.4E-05 | BIRC3,TRAF1,NGFR,GADD45B,DOT1L,MET,NFKB1,NSD2,ZBTB16,CDKN1B,BCL6,IL1R2,ID2,CCND2,PLAU,CDKN2C,CDKN1A,BCL11B,CCNT1,GADD45G,RARA,PPARG,MYCN,LMO2,MYC,ETV6,IGF1R,PML,MEIS1,NFKBIZ,ZEB1,HMGA2,FOXO1,REL,SIN3A,CXCL8,BCL2L1,JMJD1C,CEBPB,AFF1,RELA,JUP,SP1,PDGFA,RXRB,CEBPA,HOXA10 |
| path:hsa05414 | Dilated cardiomyopathy (DCM) | 1.4E-05 | ITGA3,MYH7,TGFB2,TGFB1,CACNG7,MYL2,TNNC1,TNNT2,TGFB3,TNNI3,ITGB4,MYBPC3,ITGA7,ITGAV,TPM1,ITGB1,TTN,CACNA2D3,ACTC1,MYL3,ITGA5,TPM4,ATP2A2,ACTG1,MYH6,TPM2,DMD,ITGB3 |
| path:hsa04512 | ECM-receptor interaction | 2.0E-05 | ITGA3,CD44,TNC,LAMA3,LAMC2,HMMR,COL4A4,LAMB1,COL1A1,SDC4,ITGB4,COL4A2,ITGA7,LAMC1,THBS1,ITGAV,COL6A1,COL6A2,ITGB1,ITGA5,COL6A3,COL1A2,COL4A1,AGRN,CD47,ITGB3 |
| path:hsa04810 | Regulation of actin cytoskeleton | 2.6E-05 | ITGA3,VCL,BCAR1,PPP1R12A,MYLK,ROCK1,ACTN1,FGFR1,SSH1,CRKL,MYH9,MYL9,MYL12A,PIK3R2,WASL,MYL2,APC2,PIK3R3,GNA13,PIK3CA,ACTN4,ITGB4,VAV3,ITGA7,ARHGEF4,ITGAV,FGF5,IQGAP1,PIP5K1A,GSN,ITGB1,PIP4K2A,TIAM1,BRAF,WASF2,ITGB2,ITGA5,CRK,CHRM1,PDGFD,PIK3CD,BAIAP2,SPATA13,IQGAP3,ACTG1,PIP5K1C,ARHGEF12,SRC,PDGFA,ARPC1A,ITGB3 |
| path:hsa04931 | Insulin resistance | 6.6E-05 | MLXIPL,RPS6KA6,GSK3B,PYGB,PIK3R2,PRKAG2,NFKB1,PIK3R3,PPP1R3C,PIK3CA,SLC27A1,GFPT2,PPP1R3D,SLC27A2,PTPRF,SLC27A3,CREB5,FOXO1,PPARGC1B,CRTC2,STAT3,INSR,PIK3CD,RELA,PPP1R3B,CREB3L2,SOCS3,IRS2,PTPN1,GFPT1 |
| path:hsa04015 | Rap1 signaling pathway | 8.7E-05 | RALA,HGF,MAP2K3,BCAR1,NGFR,FGFR1,CRKL,ANGPT4,PIK3R2,MET,RAPGEF1,SIPA1L2,PIK3R3,PGF,PIK3CA,PLCG1,ID1,F2RL3,KDR,ADORA2A,DOCK4,AFDN,NGF,THBS1,FGF5,IGF1R,ITGB1,VEGFC,MAGI1,PRKCA,TIAM1,BRAF,CALM3,ITGB2,CRK,RGS14,EFNA1,PDGFD,INSR,LPAR3,PIK3CD,ACTG1,SRC,PDGFA,SIPA1L1,LPAR1,SIPA1,ITGB3,RASSF5 |
| path:hsa05212 | Pancreatic cancer | 1.1E-04 | RALA,PLD1,TGFB2,GADD45B,TGFB1,PIK3R2,CDK6,NFKB1,E2F3,PIK3R3,TGFB3,PIK3CA,CDKN1A,GADD45G,CDK4,SMAD4,BRAF,JAK1,SMAD3,STAT3,BCL2L1,PIK3CD,RELA |
| path:hsa04919 | Thyroid hormone signaling pathway | 1.3E-04 | ATP1A2,PFKP,NOTCH3,GSK3B,HIF1A,PIK3R2,MED13,PIK3R3,PIK3CA,MED13L,PLCG1,BMP4,THRA,NOTCH2,MYC,ITGAV,ATP1B1,MED12L,FOXO1,THRB,PRKCA,PLCD3,SIN3A,PIK3CD,ATP2A2,ACTG1,SRC,MYH6,RXRB,DIO2,ITGB3 |
| path:hsa04068 | FoxO signaling pathway | 1.4E-04 | TGFB2,SIRT1,GADD45B,TGFB1,PIK3R2,PRKAG2,CDKN1B,BCL6,PIK3R3,SGK1,CCND2,TGFB3,PIK3CA,CDKN1A,KLF2,GADD45G,CCNB1,GABARAPL1,IGF1R,SMAD4,SKP2,CCNB3,FOXO1,FBXO32,CCNB2,BRAF,PLK1,SMAD3,STAT3,IL7R,INSR,PIK3CD,IRS2,LOC400927-CSNK1E |
| path:hsa05165 | Human papillomavirus infection | 1.6E-04 | ITGA3,FAS,TNC,LAMA3,LAMC2,PPP2R3A,NOTCH3,PSEN1,COL4A4,GSK3B,NFX1,LAMB1,JAG1,AXIN1,PIK3R2,CDK6,LFNG,COL1A1,HDAC5,NFKB1,CDKN1B,CSNK1A1,WNT5A,APC2,PIK3R3,CCND2,PIK3CA,CDKN1A,IRF1,TICAM1,TRAF3,ITGB4,NOTCH2,COL4A2,ITGA7,CDK4,LAMC1,THBS1,ITGAV,COL6A1,COL6A2,CCNA2,CREB5,ITGB1,DLG2,FOXO1,MAGI1,FZD1,ITGA5,JAK1,COL6A3,HEY1,COL1A2,TSC1,PTGER4,PIK3CD,RELA,FZD4,FZD2,CREB3L2,MAML2,COL4A1,WNT7B,HES4,HLA-E,IRF9,ITGB3 |
| path:hsa05210 | Colorectal cancer | 1.6E-04 | RALA,MLH1,GSK3B,BIRC5,TGFB2,GADD45B,AXIN1,TGFB1,PIK3R2,APC2,PIK3R3,TGFB3,PIK3CA,CDKN1A,GADD45G,MYC,SMAD4,PMAIP1,BRAF,SMAD3,PIK3CD,JUN |
| path:hsa04115 | p53 signaling pathway | 1.9E-04 | FAS,GTSE1,TP73,SESN1,GADD45B,CDK6,STEAP3,CCND2,TNFRSF10B,CDKN1A,GADD45G,SESN2,CCNB1,CDK4,THBS1,PMAIP1,SESN3,CCNB2,CDK1,SFN,RPRM |
| path:hsa04350 | TGF-beta signaling pathway | 2.5E-04 | LTBP1,ROCK1,TGFB2,BAMBI,SMAD7,TGFB1,ACVR1,ID2,ID3,TGFB3,BMP4,BMP2,GDF5,ID1,MYC,THBS1,SMAD6,INHBE,SMAD4,SMAD3,TGIF1,NOG,SP1,SMURF1 |
| path:hsa05100 | Bacterial invasion of epithelial cells | 3.7E-04 | VCL,BCAR1,CRKL,PIK3R2,CAV2,CAV1,MET,WASL,CBL,CBLB,PIK3R3,PIK3CA,SHC2,ITGB1,WASF2,ITGA5,CRK,PIK3CD,ACTG1,SEPT9,SRC,ARPC1A |
| path:hsa04012 | ErbB signaling pathway | 3.7E-04 | MAP2K7,GSK3B,ABL1,CRKL,PIK3R2,AREG,CBL,CDKN1B,CBLB,PIK3R3,PIK3CA,PLCG1,CDKN1A,EREG,STAT5A,SHC2,MYC,ABL2,PRKCA,BRAF,CRK,PIK3CD,JUN,SRC |
| path:hsa04722 | Neurotrophin signaling pathway | 5.1E-04 | NGFR,RPS6KA6,MAP2K7,TP73,PSEN1,GSK3B,ABL1,CRKL,PIK3R2,RAPGEF1,NFKB1,SH2B3,PIK3R3,PIK3CA,PLCG1,SHC2,IRAK2,SORT1,NGF,NFKBIE,BRAF,CALM3,MAPKAPK2,FRS2,CRK,PIK3CD,RELA,TRAF6,JUN,MAP3K5 |

| **Table S8. List of differentially expressed genes between CAF and NF co-cultures** | | | | | |
| --- | --- | --- | --- | --- | --- |
|  |  |  |  |  |  |
|  |  |  |  |  |  |
|  |  |  |  |  |  |
| **Gene ID** | **Gene Symbol** | **Description** | **Log2(fold change) CAF/NF** | **p-value** | **FDR** |
|
|
| 10324 | KLHL41 | kelch like family member 41 | 1.15 | 4.8E-05 | 3.6E-02 |
| 6843 | VAMP1 | vesicle associated membrane protein 1 | 1.11 | 2.5E-05 | 3.1E-02 |
| 693197 | MIR612 | microRNA 612 | 1.00 | 3.4E-05 | 3.5E-02 |
| 64129 | TINAGL1 | tubulointerstitial nephritis antigen like 1 | 0.94 | 2.3E-05 | 3.1E-02 |
| 10457 | GPNMB | glycoprotein nmb | 0.91 | 1.3E-06 | 6.3E-03 |
| 633 | BGN | biglycan | 0.86 | 4.3E-05 | 3.6E-02 |
| 402778 | IFITM10 | interferon induced transmembrane protein 10 | 0.82 | 2.1E-05 | 3.1E-02 |
| 149954 | BPIFB4 | BPI fold containing family B member 4 | 0.78 | 7.4E-05 | 4.8E-02 |
| 114823 | LENG8 | leukocyte receptor cluster member 8 | 0.73 | 5.1E-05 | 3.6E-02 |
| 51286 | CEND1 | cell cycle exit and neuronal differentiation 1 | 0.72 | 4.6E-05 | 3.6E-02 |
| 3576 | CXCL8 | C-X-C motif chemokine ligand 8 | -0.55 | 5.6E-05 | 3.8E-02 |
| 4604 | MYBPC1 | myosin binding protein C, slow type | -0.62 | 2.6E-05 | 3.1E-02 |
| 54935 | DUSP23 | dual specificity phosphatase 23 | -0.71 | 3.0E-05 | 3.2E-02 |
| 9021 | SOCS3 | suppressor of cytokine signaling 3 | -0.77 | 1.8E-05 | 3.1E-02 |
| 84879 | MFSD2A | major facilitator superfamily domain containing 2A | -0.81 | 4.0E-05 | 3.6E-02 |
| 5142 | PDE4B | phosphodiesterase 4B | -0.88 | 4.1E-05 | 3.6E-02 |
| 3569 | IL6 | interleukin 6 | -0.98 | 9.4E-06 | 2.2E-02 |
| 6288 | SAA1 | serum amyloid A1 | -1.44 | 2.4E-07 | 3.4E-03 |
| 7850 | IL1R2 | interleukin 1 receptor type 2 | -1.49 | 3.6E-06 | 1.3E-02 |
| 6004 | RGS16 | regulator of G-protein signaling 16 | -1.49 | 6.1E-07 | 4.3E-03 |
| 6289 | SAA2 | serum amyloid A2 | -1.73 | 1.2E-05 | 2.4E-02 |
| 6279 | S100A8 | S100 calcium binding protein A8 | -2.40 | 8.3E-06 | 2.2E-02 |

| **Table S9. List of migration/metastasis-related differentially expressed genes associated with GPNMB** | | | |  |  |
| --- | --- | --- | --- | --- | --- |
|  |  |  |  |  |  |
| Known in literature |  |  |  |  |  |
|  |  |  |  |  |  |
| **Gene ID** | **Gene Symbol** | **Description** | **Log2(fold change) CAF/Ctrl** | **p-value** | **FDR** |
|
|
| 10457 | GPNMB | glycoprotein nmb(GPNMB) | 1.29 | 6.5E-08 | 3.8E-05 |
| 3383 | ICAM1 | intercellular adhesion molecule 1(ICAM1) | 1.56 | 9.3E-07 | 1.4E-04 |
| 7477 | WNT7B | Wnt family member 7B(WNT7B) | 1.64 | 2.3E-06 | 2.4E-04 |
| 3679 | ITGA7 | integrin subunit alpha 7(ITGA7) | 0.75 | 4.6E-06 | 3.7E-04 |
| 3678 | ITGA5 | integrin subunit alpha 5(ITGA5) | 1.13 | 4.7E-06 | 3.7E-04 |
| 3690 | ITGB3 | integrin subunit beta 3(ITGB3) | 1.51 | 1.2E-05 | 6.8E-04 |
| 960 | CD44 | CD44 molecule (Indian blood group)(CD44) | 0.72 | 1.3E-05 | 7.0E-04 |
| 3685 | ITGAV | integrin subunit alpha V(ITGAV) | 0.67 | 2.0E-05 | 8.8E-04 |
| 7474 | WNT5A | Wnt family member 5A(WNT5A) | 0.73 | 3.6E-05 | 1.3E-03 |
| 5270 | SERPINE2 | serpin family E member 2(SERPINE2) | 0.71 | 6.8E-05 | 1.9E-03 |
| 5271 | SERPINB8 | serpin family B member 8(SERPINB8) | 0.91 | 8.5E-05 | 2.2E-03 |
| 3675 | ITGA3 | integrin subunit alpha 3(ITGA3) | 0.55 | 1.1E-04 | 2.7E-03 |
| 710 | SERPING1 | serpin family G member 1(SERPING1) | 2.40 | 4.6E-04 | 7.1E-03 |
| 3688 | ITGB1 | integrin subunit beta 1(ITGB1) | 0.43 | 5.7E-04 | 8.0E-03 |
| 4323 | MMP14 | matrix metallopeptidase 14(MMP14) | 0.48 | 1.1E-03 | 1.3E-02 |
| 5176 | SERPINF1 | serpin family F member 1(SERPINF1) | -0.63 | 3.4E-03 | 2.7E-02 |
| 3385 | ICAM3 | intercellular adhesion molecule 3(ICAM3) | -0.66 | 4.0E-03 | 3.1E-02 |
| 5265 | SERPINA1 | serpin family A member 1(SERPINA1) | 0.57 | 5.4E-03 | 3.7E-02 |
| 3689 | ITGB2 | integrin subunit beta 2(ITGB2) | -1.18 | 7.2E-03 | 4.4E-02 |
| 6352 | CCL5 | C-C motif chemokine ligand 5(CCL5) | 1.06 | 7.6E-03 | 4.6E-02 |
| 4313 | MMP2 | matrix metallopeptidase 2(MMP2) | 0.30 | 7.9E-03 | 4.7E-02 |
| 3691 | ITGB4 | integrin subunit beta 4(ITGB4) | 0.33 | 8.2E-03 | 4.8E-02 |
| 5268 | SERPINB5 | serpin family B member 5(SERPINB5) | -0.34 | 8.7E-03 | 5.0E-02 |
| 3672 | ITGA1 | integrin subunit alpha 1(ITGA1) | 0.60 | 9.7E-03 | 5.4E-02 |
| 3687 | ITGAX | integrin subunit alpha X(ITGAX) | 2.92 | 1.0E-02 | 5.5E-02 |
| 4314 | MMP3 | matrix metallopeptidase 3(MMP3) | 2.41 | 1.2E-02 | 6.2E-02 |
| 3655 | ITGA6 | integrin subunit alpha 6(ITGA6) | 0.23 | 1.5E-02 | 7.0E-02 |
| 3386 | ICAM4 | intercellular adhesion molecule 4 (Landsteiner-Wiener blood group)(ICAM4) | 1.48 | 1.5E-02 | 7.1E-02 |
